# Supplementary material for: Multiomics Analysis of Structural Magnetic Resonance Imaging of the Brain and Cerebrospinal Fluid Metabolomics in Cognitively Normal and Impaired Adults
Source: Front Aging Neurosci. 2022 Jan 25;13:796067. doi: 10.3389/fnagi.2021.796067 (PMC8822333; doi:10.3389/fnagi.2021.796067)
Supplement: Supplementary file 3 [file Table_3.xlsx]

## Sheet: Sheet1
Supplemental Table 3. The 463 cerebrospinal fluid annotated metabolites shown with the number of imaging voxel connections and how many to which imaging-metabolite cluster
mz	retention time	Name	Confidence	HMDB ID	Formula	Adduct	# voxel links	C1 (Parietal Cortex)	C2 (Posterior Thalamus)	C3	C4 (Hippocampus - right hemisphere)	C5	C6 (Hippocampus - left hemisphere - group 1)	C7 (Thalamus)	C8 (Hippocampus - left hemisphere - group 2)	C9	C10 - Occipital lobe/Orbitofrontal cortex	C11	C12
86.0601	31.3	2-Pyrrolidinone, Acetone cyanohydrin	4	HMDB02039, HMDB60427	C4H7NO	M+H, M+H	7	1	0	0	0	0	6	0	0	0	0	0	0
86.0713	33.6	Imidazole	4	HMDB01525	C3H4N2	M+NH4	3	0	0	0	3	0	0	0	0	0	0	0	0
88.0043	198	Unknown	5				122	0	25	0	71	0	13	0	8	0	5	0	0
90.0373	19.1	4-Hydroxy-L-glutamic acid, A-Ketoglutaric acid oxime, Methanethiol, Erucin, 1-Thiocyanato-4-(methylthio)butane, N-Formyl-L-aspartate	4	HMDB02273, HMDB02467, HMDB03227, HMDB33764, HMDB38446, HMDB60495	C5H7NO5	M+H+NH4, M+H+NH4, M+ACN+H, M+H+NH4, M+H+NH4, M+H+NH4	5	0	0	0	0	0	0	4	1	0	0	0	0
91.5099	92.4	Unknown	5				5	5	0	0	0	0	0	0	0	0	0	0	0
94.0032	288.1	Selenocysteine	4	HMDB03288	C3H7NO2Se	M+H+NH4	8	0	0	0	0	0	0	8	0	0	0	0	0
94.04	41.2	2-Furoylglycine, Malonic acid, Hydroxypyruvic acid, Tartronate semialdehyde, L-23-Dihydrodipicolinate	4	HMDB00439, HMDB00691, HMDB01352, HMDB06938, HMDB12247	C7H7NO4	M+H+NH4, M+2ACN+2H, M+2ACN+2H, M+2ACN+2H, M+H+NH4	63	0	0	0	0	0	0	0	0	0	63	0	0
94.5023	28.9	Unknown	5				1	0	0	1	0	0	0	0	0	0	0	0	0
95.0855	24.9	1-Methyl-13-cyclohexadiene, 2-Methyl-13-cyclohexadiene	4	HMDB31532, HMDB32395	C7H10	M+H, M+H	75	0	19	0	0	0	0	0	0	0	56	0	0
97.0009	270.6	Unknown	5				9	0	0	0	0	0	0	0	0	0	9	0	0
97.0149	290.5	Methanethiol, Dimethyl selenide	4	HMDB03227, HMDB33212	CH4S	2M+H, M+2ACN+2H	44	0	44	0	0	0	0	0	0	0	0	0	0
97.1012	24.9	2-Heptanone, 4-Heptanone, Ethyl isobutyl ketone, (Z)-4-Hepten-1-ol, 24-Dimethyl-3-pentanone, Heptanal, 3-Heptanone, 3-Methylcyclohexanol, 5-Methyl-2-hexanone, 3-Methylhexanal, 1-Ethoxy-3-methyl-2-butene, ()-2-Methylhexanal, (2R4Z)-4-Hepten-2-ol, 1-Methylcyclohexanol	4	HMDB03671, HMDB04814, HMDB05841, HMDB31405, HMDB31429, HMDB31475, HMDB31482, HMDB31538, HMDB31549, HMDB32405, HMDB38052, HMDB40191, HMDB41320, HMDB59693	C7H14O	M+H-H2O, M+H-H2O, M+H-H2O, M+H-H2O, M+H-H2O, M+H-H2O, M+H-H2O, M+H-H2O, M+H-H2O, M+H-H2O, M+H-H2O, M+H-H2O, M+H-H2O, M+H-H2O	202	0	44	0	10	0	0	0	0	0	148	0	0
98.9948	281.8	Unknown	5				18	0	0	0	0	0	0	0	0	0	18	0	0
100.051	33.8	8-Hydroxy-7-methylguanine, Diazenedicarboxamide	4	HMDB06037, HMDB29616	C6H7N5O2	M+H+NH4, M+2ACN+2H	3	0	1	0	0	0	0	0	2	0	0	0	0
101.107	106.1	Trimethylamine, ()-23-Dihydro-3-methyl-1H-pyrrole, 1-Propylamine, Pentanenitrile	4	HMDB00906, HMDB33529, HMDB34006, HMDB40173	C3H9N	M+ACN+H, M+NH4, M+ACN+H, M+NH4	4	0	0	0	0	0	0	0	0	0	0	4	0
103.51	101.4	Unknown	5				41	0	4	0	9	0	0	0	0	0	28	0	0
104.071	276.7	Aminobutyrate	1	HMDB00112	C4H9NO2	M+H	16	0	15	0	0	0	1	0	0	0	0	0	0
104.082	36.7	Unknown	5				529	0	3	0	5	0	186	89	243	0	3	0	0
105.11	34.6	Unknown	5				27	0	0	0	0	0	27	0	0	0	0	0	0
106.086	42.3	Diethanolamine	4	HMDB04437	C4H11NO2	M+H	44	0	0	0	0	0	0	44	0	0	0	0	0
107.052	285	3-(Methylthio)-1-propanol, 3-Mercapto-2-butanol, 4-Mercapto-2-butanol	4	HMDB31716, HMDB40185, HMDB41475	C4H10OS	M+H, M+H, M+H	1	0	1	0	0	0	0	0	0	0	0	0	0
108.517	192.3	O-Phospho-4-hydroxy-L-threonine	4	HMDB06802	C4H10NO7P	M+2H	61	0	0	0	22	0	0	0	5	0	34	0	0
110.035	42.4	Unknown	5				1242	69	90	1	135	0	396	1	230	0	320	0	0
110.105	24.5	Unknown	5				51	0	0	0	0	0	0	0	0	0	51	0	0
110.521	28.9	Benzoyl phosphate	4	HMDB60440	C7H7O5P	M+H+NH4	11	0	0	0	0	0	0	0	11	0	0	0	0
111.044	201	Pyrocatechol, Hydroquinone, (EE)-24-Hexadienedial, 13-Benzenediol, 5-Methyl-2-furancarboxaldehyde, 2-Acetylfuran	4	HMDB00957, HMDB02434, HMDB31180, HMDB32037, HMDB33002, HMDB33127	C6H6O2	M+H, M+H, M+H, M+H, M+H, M+H	1	0	0	0	0	0	0	0	0	0	1	0	0
111.063	28.9	4-Aminophenol, 2-Acetylpyrrole, 1-Methyl-2-pyrrolecarboxaldehyde	3	HMDB01169, HMDB35882, HMDB40582	C6H7NO	M+H_[+1], M+H_[+1], M+H_[+1]	19	0	0	0	0	0	0	0	0	0	19	0	0
111.081	157.2	Histamine	1	HMDB0000870	C5H9N3	M[1+]	757	0	2	0	95	0	354	0	83	0	223	0	0
111.984	291.1	Unknown	5				1	0	1	0	0	0	0	0	0	0	0	0	0
112.555	273.7	Unknown	5				60	0	0	0	0	0	0	0	0	0	60	0	0
113.096	27.1	(Z)-4-Heptenal, 3-Hepten-2-one, (E)-4-Hepten-2-one, 2-Hepten-4-one, 2-Methylcyclohexanone, 4-Methylcyclohexanone, 5-Methyl-3-hexen-2-one, 5-Methyl-5-hexen-2-one, trans-2-trans-4-Heptadien-1-ol, (R)-3-Methylcyclohexanone, 2-Heptenal, xi-3-Methyl-3-cyclohexen-1-ol, 25-Heptadien-1-ol	4	HMDB31483, HMDB31486, HMDB31487, HMDB31488, HMDB31539, HMDB31540, HMDB31550, HMDB31551, HMDB32301, HMDB33667, HMDB33827, HMDB34372, HMDB40339	C7H12O	M+H, M+H, M+H, M+H, M+H, M+H, M+H, M+H, M+H, M+H, M+H, M+H, M+H	9	0	1	0	0	0	0	0	0	0	0	8	0
113.705	35.3	Unknown	5				20	0	0	0	0	0	0	0	0	0	20	0	0
114.111	34.7	Unknown	5				1496	66	281	0	195	0	268	146	506	0	31	3	0
114.429	35	Unknown	5				3	0	0	0	0	0	0	0	0	0	0	3	0
114.967	286.2	Asparagusic acid	4	HMDB29611	C4H6O2S2	M+H-2H2O	2	0	2	0	0	0	0	0	0	0	0	0	0
115.063	34.4	Creatinine	3	HMDB00562	C4H7N3O	M+H_[+1]	1374	49	187	0	129	0	318	143	530	0	18	0	0
115.075	282.1	Delta-Hexanolactone, Gamma-Caprolactone, trans-Hex-2-enoic acid, Allyl propionate, 2-Methyl-4-pentenoic acid, 23-Hexanedione, 34-Hexanedione, 3-Hexenoic acid, 4-Methyl-23-pentanedione, 2-Methyl-2-pentenoic acid, 4-Methyl-2-pentenoic acid, 2-Methyl-3-pentenoic acid, Prenyl formate, 5-Oxohexanal, Ethyl crotonate, Methyl 4-pentenoate, epsilon-Caprolactone	4	HMDB00453, HMDB03843, HMDB10719, HMDB29487, HMDB31158, HMDB31491, HMDB31492, HMDB31501, HMDB31559, HMDB31560, HMDB31561, HMDB31562, HMDB32490, HMDB33568, HMDB39581, HMDB40328, HMDB60476	C6H10O2	M+H, M+H, M+H, M+H, M+H, M+H, M+H, M+H, M+H, M+H, M+H, M+H, M+H, M+H, M+H, M+H, M+H	560	0	204	0	75	0	184	0	63	0	34	0	0
116.067	34.2	Dicyclohexyl disulfide	4	HMDB41448	C12H22S2	M+2H	1658	85	236	0	172	0	419	126	548	0	69	3	0
116.073	34.2	Creatinine	3	HMDB00562	C4H7N3O	M+H_[+2]	639	67	184	1	4	0	108	154	119	0	2	0	0
117.102	182.9	5-Aminopentanamide	4	HMDB12176	C5H12N2O	M+H	658	0	295	2	31	0	3	146	115	0	45	21	0
117.97	87.3	Methyl isothiocyanate	4	HMDB34106	C2H3NS	M+2Na-H	1	1	0	0	0	0	0	0	0	0	0	0	0
118.04	270.3	56-Dihydroxyindole-2-carboxylic acid, L-Dopachrome, D-Dopachrome, Cysteinyl-Hydroxyproline, Hydroxyprolyl-Cysteine	4	HMDB01253, HMDB01430, HMDB11622, HMDB28776, HMDB28860	C9H7NO4	M+ACN+2H, M+ACN+2H, M+ACN+2H, M+2H, M+2H	1	0	0	0	0	1	0	0	0	0	0	0	0
118.05	159.7	N-Acetylglycine	1	HMDB00532	C4H7NO3	M+H	8	0	0	0	0	0	4	0	3	0	1	0	0
118.06	204.6	Guanidoacetic acid	1	HMDB00128	C3H7N3O2	M+H	258	0	1	0	65	0	131	0	58	0	3	0	0
119.035	41.2	Hypoxanthine, Erythronic acid, Threonic acid, Allopurinol	3	HMDB00157, HMDB00613, HMDB00943, HMDB14581	C5H4N4O	M+H-H2O, M+H-H2O, M+H-H2O, M+H-H2O	1197	47	65	0	170	0	390	0	182	0	343	0	0
120.032	118.4	L-4-Chlorotryptophan, 1-Propenyl 1-(propylsulfinyl)propyl disulfide, 1-(1-Propenylsulfinyl)propyl propyl disulfide, ()-6-Chlorotryptophan, 1-(2-Propenylsulfinyl)propyl propyl disulfide, 2-Propenyl 1-(propylsulfinyl)propyl disulfide	4	HMDB30400, HMDB33073, HMDB33074, HMDB33557, HMDB36370, HMDB36375	C11H11ClN2O2	M+2H, M+2H, M+2H, M+2H, M+2H, M+2H	4	0	0	0	0	0	0	0	4	0	0	0	0
120.044	248	Unknown	5				11	0	0	0	0	0	0	10	1	0	0	0	0
121.04	33.4	Methyl 4-chloro-1H-indole-3-acetate	4	HMDB32937	C11H10ClNO2	M+H+NH4	119	0	0	0	0	0	11	0	108	0	0	0	0
121.101	159.6	124-Trimethylbenzene, Isopropylbenzene, 124-Tris(methylene)cyclohexane, Mesitylene, o-Ethyltoluene, m-Ethyltoluene, Propylbenzene, Hemimellitene	4	HMDB13733, HMDB34029, HMDB40458, HMDB41924, HMDB59819, HMDB59848, HMDB59877, HMDB59901	C9H12	M+H, M+H, M+H, M+H, M+H, M+H, M+H, M+H	7	0	0	0	0	7	0	0	0	0	0	0	0
121.947	94.6	Unknown	5				1	0	0	0	0	0	0	0	1	0	0	0	0
122.965	271.7	Unknown	5				550	0	214	0	196	0	26	0	96	0	18	0	0
127.073	98.2	Melamine	4	HMDB41922	C3H6N6	M+H	163	0	34	0	0	0	0	110	7	0	12	0	0
128.034	75.2	Hydroxyminaline	4	HMDB34368	C5H5NO3	M+H	18	0	0	0	18	0	0	0	0	0	0	0	0
128.107	28	Nor-psi-tropine, 1-(1-Pyrrolidinyl)-2-propanone	3	HMDB31667, HMDB40030	C7H13NO	M+H, M+H	5	0	0	0	0	0	0	0	0	0	0	5	0
128.986	284.4	Unknown	5				2	0	0	0	0	0	2	0	0	0	0	0	0
129.084	67.3	Unknown	5				1	0	1	0	0	0	0	0	0	0	0	0	0
131.002	119.7	Unknown	5				7	7	0	0	0	0	0	0	0	0	0	0	0
131.565	125.1	Flurbiprofen, (R)C(R)S-S-Propylcysteine sulfoxide, Cyclamic acid	4	HMDB14850, HMDB29442, HMDB31340	C15H13FO2	M+H+NH4, M+2ACN+2H, M+2ACN+2H	5	0	0	0	0	0	0	0	0	0	5	0	0
132.035	158.1	Unknown	5				5	0	0	0	0	0	0	0	0	0	5	0	0
132.102	41.6	L-Leucine	1	HMDB00687	C6H13NO2	M+H	6	6	0	0	0	0	0	0	0	0	0	0	0
133.086	234.3	2-Hydroxy-3-methylpentanoic acid, (5R)-5-Hydroxyhexanoic acid, 5-Hydroxyhexanoic acid, D-Leucic acid, Leucinic acid, Hydroxyisocaproic acid, 2-Hydroxycaproic acid, 2-Ethyl-2-Hydroxybutyric acid, (R)-3-Hydroxyhexanoic acid, 6-Hydroxyhexanoic acid, 2-Methyl-3-hydroxyvaleric acid, (-)-1-Acetoxy-1-ethoxyethane, Paraldehyde, 44-Dimethoxy-2-butanone, Ethyl ()-3-hydroxybutyrate, Butoxyacetic acid, Threo…	4	HMDB00317, HMDB00409, HMDB00525, HMDB00624, HMDB00665, HMDB00746, HMDB01624, HMDB01975, HMDB10718, HMDB12843, HMDB29166, HMDB32158, HMDB32456, HMDB33851, HMDB40409, HMDB41844, HMDB59770	C6H12O3	M+H, M+H, M+H, M+H, M+H, M+H, M+H, M+H, M+H, M+H, M+H, M+H, M+H, M+H, M+H, M+H, M+H	422	0	355	0	3	0	55	1	5	0	3	0	0
133.105	40.4	L-Isoleucine, L-Alloisoleucine, L-Leucine, L-Norleucine, Aminocaproic acid, Beta-Leucine, D-Leucine, 3-Aminocaproic acid, 2-Heptanethiol, Heptane-1-thiol, ()-erythro-Isoleucine, 6-Deoxyfagomine, N-(2-Hydroxyethyl)-morpholine	3	HMDB00172, HMDB00557, HMDB00687, HMDB01645, HMDB01901, HMDB03640, HMDB13773, HMDB29168, HMDB32303, HMDB32304, HMDB33923, HMDB36382, HMDB60650	C6H13NO2	M+H_[+1], M+H_[+1], M+H_[+1], M+H_[+1], M+H_[+1], M+H_[+1], M+H_[+1], M+H_[+1], M+H, M+H, M+H_[+1], M+H_[+1], M+H_[+1]	15	15	0	0	0	0	0	0	0	0	0	0	0
134.06	265.7	(S)-Pterosin K	4	HMDB36602	C15H19ClO2	M+2H	2	0	0	0	0	0	0	0	0	0	2	0	0
134.106	40.4	L-Isoleucine, L-Alloisoleucine, L-Leucine, L-Norleucine, Aminocaproic acid, Beta-Leucine, D-Leucine, 3-Aminocaproic acid, 2-Heptanethiol, Heptane-1-thiol, ()-erythro-Isoleucine, 6-Deoxyfagomine, N-(2-Hydroxyethyl)-morpholine	3	HMDB00172, HMDB00557, HMDB00687, HMDB01645, HMDB01901, HMDB03640, HMDB13773, HMDB29168, HMDB32303, HMDB32304, HMDB33923, HMDB36382, HMDB60650	C6H13NO2	M+H_[+2], M+H_[+2], M+H_[+2], M+H_[+2], M+H_[+2], M+H_[+2], M+H_[+2], M+H_[+2], M+H_[+1], M+H_[+1], M+H_[+2], M+H_[+2], M+H_[+2]	11	11	0	0	0	0	0	0	0	0	0	0	0
134.109	40.5	L-Isoleucine, L-Alloisoleucine, L-Leucine, L-Norleucine, Aminocaproic acid, Beta-Leucine, D-Leucine, 3-Aminocaproic acid, 2-Heptanethiol, Heptane-1-thiol, ()-erythro-Isoleucine, 6-Deoxyfagomine, N-(2-Hydroxyethyl)-morpholine	3	HMDB00172, HMDB00557, HMDB00687, HMDB01645, HMDB01901, HMDB03640, HMDB13773, HMDB29168, HMDB32303, HMDB32304, HMDB33923, HMDB36382, HMDB60650	C6H13NO2	M+H_[+2], M+H_[+2], M+H_[+2], M+H_[+2], M+H_[+2], M+H_[+2], M+H_[+2], M+H_[+2], M+H_[+1], M+H_[+1], M+H_[+2], M+H_[+2], M+H_[+2]	67	66	0	0	0	0	0	0	0	0	1	0	0
134.992	282.1	Unknown	5				18	0	18	0	0	0	0	0	0	0	0	0	0
137.046	43.2	Hypoxanthine	1	HMDB00157	C5H4N4O	M+H	476	58	1	0	6	0	182	0	5	0	224	0	0
137.096	34.4	236-Trimethylphenol, Benzyl ethyl ether, p-Isopropylphenol, 1-Phenyl-1-propanol, 2-Phenyl-1-propanol, 2-Isopropylphenol, 1-Methoxy-24-dimethylbenzene, Nona-246-trienal, 246-Trimethylphenol, (2-Methoxyethyl)benzene, 2-Propylphenol, 4-Propylphenol, 3-Phenyl-1-propanol, ()-1-(4-Methylphenyl)ethanol, 4-Ethyl-2-methylphenol, 3-Ethyl-5-methylphenol, 3-Ethyl-4-methylphenol, 2-Ethyl-5-methylphenol, 2-Eth…	3	HMDB29667, HMDB31312, HMDB31446, HMDB31627, HMDB31628, HMDB32029, HMDB32149, HMDB32441, HMDB32544, HMDB32621, HMDB32624, HMDB32625, HMDB33962, HMDB34378, HMDB38984, HMDB38985, HMDB38986, HMDB38987, HMDB38988, HMDB39782, HMDB59896	C9H12O	M+H, M+H, M+H, M+H, M+H, M+H, M+H, M+H, M+H, M+H, M+H, M+H, M+H, M+H, M+H, M+H, M+H, M+H, M+H, M+H, M+H	7	0	0	0	0	7	0	0	0	0	0	0	0
137.469	96.2	Unknown	5				2	2	0	0	0	0	0	0	0	0	0	0	0
138.017	22.4	Benzothiazole	3	HMDB32930	C7H5NS	M+H_[+2]	1	0	0	0	0	0	0	0	0	0	1	0	0
138.043	41	Hypoxanthine, Erythronic acid, Threonic acid, Allopurinol, 1-Pentanesulfenothioic acid, Ethyl propyl disulfide, Ethyl isopropyl disulfide	3	HMDB00157, HMDB00613, HMDB00943, HMDB14581, HMDB31160, HMDB33053, HMDB33054	C5H4N4O	M+H_[+1], M+H_[+1], M+H_[+1], M+H_[+1], M+H_[+1], M+H_[+1], M+H_[+1]	144	0	0	0	0	0	0	0	0	0	144	0	0
139.025	103.8	Chlorpropamide	4	HMDB14810	C10H13ClN2O3S	M+2H	1	0	0	0	0	0	0	0	0	0	0	1	0
141.011	104	Unknown	5				26	0	0	0	0	0	1	0	22	0	0	3	0
141.055	203.4	Ethyl maltol, Furfuryl acetate, Ethyl furoate, Ethyl 3-furoate	4	HMDB31735, HMDB34246, HMDB59862, HMDB59880	C7H8O3	M+H, M+H, M+H, M+H	1	0	1	0	0	0	0	0	0	0	0	0	0
141.102	193.7	Acetone, Propanal, Methyloxirane, Allyl alcohol	4	HMDB01659, HMDB03366, HMDB31558, HMDB31652	C3H6O	M+2ACN+H, M+2ACN+H, M+2ACN+H, M+2ACN+H	189	0	112	0	13	0	0	6	30	0	28	0	0
142.991	195.6	2-Methylthiophene, 3-Methylthiophene	4	HMDB33118, HMDB33119	C5H6S	M+2Na-H, M+2Na-H	45	0	0	0	1	0	0	0	44	0	0	0	0
143.997	122.8	Dimethyl trisulfide	4	HMDB13780	C2H6S3	M+NH4	1	0	0	0	1	0	0	0	0	0	0	0	0
144.523	85.5	Dimethylallylpyrophosphate, Isopentenyl pyrophosphate	4	HMDB01120, HMDB01347	C5H12O7P2	M+ACN+2H, M+ACN+2H	1	0	0	0	0	0	0	0	1	0	0	0	0
145.531	74.6	Unknown	5				17	0	0	0	0	0	17	0	0	0	0	0	0
145.986	174.6	Bis(2-methyl-3-furanyl)tetrasulfide	4	HMDB36168	C10H10O2S4	M+2H	104	0	0	0	0	0	33	0	70	0	1	0	0
146.001	283.2	45-Dihydro-2-methylthiazole, 25-Dichloro-carboxymethylenebut-2-en-4-olide	4	HMDB29555, HMDB60364	C4H7NS	M+2Na-H, M+2ACN+2H	1	0	0	0	0	0	1	0	0	0	0	0	0
146.509	70.6	35-Dichloro-4-hydroxy-2-methoxy-6-methylbenzoic acid	4	HMDB33822	C9H8Cl2O4	M+ACN+2H	16	0	10	0	0	0	0	0	2	0	4	0	0
148.016	109	Unknown	5				1	0	0	0	0	0	0	0	0	0	1	0	0
148.06	54.9	N-Methyl-D-aspartic acid	1	HMDB02393	C5H9NO4	M+H	9	1	0	0	0	0	8	0	0	0	0	0	0
148.536	95.7	L-Aspartyl-4-phosphate	4	HMDB12250	C4H8NO7P	M+2ACN+2H	4	0	0	0	0	0	4	0	0	0	0	0	0
148.943	108.3	Unknown	5				9	0	0	0	0	0	0	0	0	9	0	0	0
149.028	76.7	2-keto-4-methylthiobutyrate	4	HMDB01553	C5H8O3S	M+H	66	66	0	0	0	0	0	0	0	0	0	0	0
150.077	64.7	6-Methyladenine, 1-Methyladenine, 3-Methyladenine, 7-Methyladenine	4	HMDB02099, HMDB11599, HMDB11600, HMDB11614	C6H7N5	M+H, M+H, M+H, M+H	7	0	0	0	0	0	0	0	7	0	0	0	0
150.523	37.8	Unknown	5				13	0	0	0	0	0	0	0	0	0	13	0	0
151.058	198.9	24-Dihydroxy-46-dimethoxychalcone, Heliannone B, Heliannone A, Melilotocarpan A, 8-Hydroxy-39-dimethoxypterocarpan, 3-Hydroxy-29-dimethoxypterocarpan, 3-Hydroxy-49-dimethoxypterocarpan, (EE)-1-Chloro-311-tridecadiene-579-triyn-2-ol, Methylnissolin, Homopisatin, Sativanone, 3-(Isothiocyanatomethyl)-1-methoxy-1H-indole, 44-Dihydroxy-26-dimethoxychalcone, 57-Dihydroxy-4-methoxy-8-methylflavanone, 57…	4	HMDB30875, HMDB31421, HMDB31705, HMDB33142, HMDB33292, HMDB33861, HMDB34001, HMDB34007, HMDB34008, HMDB34116, HMDB38110, HMDB38463, HMDB38812, HMDB41321, HMDB41322	C17H16O5	M+2H, M+2H, M+2H, M+2H, M+2H, M+2H, M+2H, M+2ACN+2H, M+2H, M+2H, M+2H, M+2ACN+2H, M+2H, M+2H, M+2H	2	0	0	0	0	0	0	0	0	0	0	2	0
152.151	23.6	Unknown	5				1	0	0	0	0	0	0	0	0	0	1	0	0
153.019	43	Gallic acid, cis-2-Methylaconitate, 246-Trihydroxybenzoic acid, 234-Trihydroxybenzoic acid, 5-(345-Trihydroxyphenyl)-gamma-valerolactone-3-O-sulphate, 5-(345-Trihydroxyphenyl)-gamma-valerolactone-4-O-sulphate, Sinapinic acid-O-sulphate, (Z)-But-1-ene-124-tricarboxylate	4	HMDB05807, HMDB06357, HMDB29649, HMDB59964, HMDB59985, HMDB59987, HMDB60020, HMDB60320	C7H6O5	M+H-H2O, M+H-2H2O, M+H-H2O, M+H-H2O, M+2H, M+2H, M+2H, M+H-2H2O	40	0	40	0	0	0	0	0	0	0	0	0	0
153.091	26.6	2-Isopropyl-14-benzenediol, 3-(4-Hydroxyphenyl)-1-propanol, 3-(5-Methyl-2-furanyl)butanal, 2-Propenyl 24-hexadienoate, 1-(2-Furanyl)-1-pentanone, 4-(Ethoxymethyl)phenol, 4-Ethyl-2-methoxyphenol, 266-Trimethyl-2-cyclohexene-14-dione, 2-(Ethoxymethyl)phenol, (Dimethoxymethyl)benzene, 2-Isopropoxyphenol, 35-Dimethoxytoluene	4	HMDB32132, HMDB32599, HMDB36169, HMDB36227, HMDB39801, HMDB39956, HMDB40175, HMDB40216, HMDB40449, HMDB41326, HMDB41804, HMDB59853	C9H12O2	M+H, M+H, M+H, M+H, M+H, M+H, M+H, M+H, M+H, M+H, M+H, M+H	104	0	60	0	3	0	0	0	41	0	0	0	0
153.127	226.2	Unknown	5				192	0	14	0	0	0	46	49	83	0	0	0	0
153.528	145.6	Unknown	5				1	1	0	0	0	0	0	0	0	0	0	0	0
154.02	39.2	Unknown	5				10	0	0	0	0	0	0	10	0	0	0	0	0
154.025	43	Unknown	5				555	78	23	2	3	0	271	0	124	0	54	0	0
154.131	26.3	(-)-trans-Carveol, Perillyl alcohol, Alpha-Pinene-oxide, p-Menth-3-en-9-al, Isocitral, 3-Methyl-5-propyl-2-cyclohexen-1-one, 26-Dimethyl-17-octadien-3-one, (E)-37-Dimethyl-157-octatrien-3-ol, 2-(trans-2-Pentenyl)cyclopentanone, p-Mentha-1(6)8-dien-3-ol, cis-2-Thujen-4-ol, (R)-Campholenic aldehyde, (R)-Carvotanacetone, Piperitone, ()-Fenchone, (1S4R)-p-Mentha-28-dien-1-ol, (1R4R)-p-Mentha-28-dien-…	3	HMDB03450, HMDB03634, HMDB03667, HMDB30892, HMDB30893, HMDB31854, HMDB32120, HMDB32242, HMDB32536, HMDB34715, HMDB34916, HMDB34973, HMDB34974, HMDB34975, HMDB34985, HMDB35054, HMDB35077, HMDB35078, HMDB35092, HMDB35100, HMDB35120, HMDB35125, HMDB35158, HMDB35203, HMDB35241, HMDB35277, HMDB35280, HMDB35600, HMDB35604, HMDB35622, HMDB35656, HMDB35706, HMDB35737, HMDB35738, HMDB35741, HMDB35743, HMD…	C10H16O	M+H_[+1], M+H_[+1], M+H_[+1], M+H_[+1], M+H_[+1], M+H_[+1], M+H_[+1], M+H_[+1], M+H_[+1], M+H_[+1], M+H_[+1], M+H_[+1], M+H_[+1], M+H_[+1], M+H_[+1], M+H_[+1], M+H_[+1], M+H_[+1], M+H_[+1], M+H_[+1], M+H_[+1], M+H_[+1], M+H_[+1], M+H_[+1], M+H_[+1], M+H_[+1], M+H_[+1], M+H_[+1], M+H_[+1], M+H_[+1], M+H_[+1], M+H_[+1], M+H_[+1], M+H_[+1], M+H_[+1], M+H_[+1], M+H_[+1], M+H_[+1], M+H_[+1], M+H_[+1],…	6	0	0	0	0	0	0	0	6	0	0	0	0
154.98	99.3	Pyrocatechol sulfate	4	HMDB59724	C6H6O5S	M+H-2H2O	40	0	0	0	0	0	40	0	0	0	0	0	0
155.154	283.5	Pentane	4	HMDB29603	C5H12	M+2ACN+H	2	0	0	0	2	0	0	0	0	0	0	0	0
158.972	277.7	Unknown	5				17	0	1	0	1	0	0	0	0	0	0	15	0
159.027	41.8	Hypoxanthine, Erythronic acid, Threonic acid, Allopurinol, 1-Pentanesulfenothioic acid, Ethyl propyl disulfide, Ethyl isopropyl disulfide	3	HMDB00157, HMDB00613, HMDB00943, HMDB14581, HMDB31160, HMDB33053, HMDB33054	C5H4N4O	M+Na, M+Na, M+Na, M+Na, M+Na, M+Na, M+Na	2	0	0	0	0	0	0	0	0	0	2	0	0
160.031	41.2	Unknown	5				1	0	0	0	0	0	0	0	0	0	1	0	0
160.044	100.5	Brompheniramine, Tamarixetin, Dexbrompheniramine, Polyvidone, Mycochromone, Dihydroisorhamnetin	4	HMDB01941, HMDB02937, HMDB14549, HMDB33843, HMDB33892, HMDB37501	C16H19BrN2	M+2H, M+2H, M+2H, M+H-H2O, M+2H, M+2H	2	0	0	0	0	0	0	0	2	0	0	0	0
160.989	278.6	Unknown	5				2	0	0	0	0	0	0	0	0	0	2	0	0
165.164	24.7	Dodecanoic acid, Ethyl decanoate, 3-Methylcyclopentene, 2-Heptyl butyrate, Nonanal propyleneglycol acetal, Hexyl hexanoate, Isopropyl nonanoate, Octyl butanoate, Octyl 2-methylpropanoate, (R)-Dihydrocitronellol acetate, Pentyl heptanoate, Decyl acetate, Isobutyl octanoate	4	HMDB00638, HMDB30998, HMDB31544, HMDB32310, HMDB32440, HMDB33619, HMDB34128, HMDB34136, HMDB34137, HMDB35410, HMDB36225, HMDB40166, HMDB59868	C12H24O2	M+H-2H2O, M+H-2H2O, 2M+H, M+H-2H2O, M+H-2H2O, M+H-2H2O, M+H-2H2O, M+H-2H2O, M+H-2H2O, M+H-2H2O, M+H-2H2O, M+H-2H2O, M+H-2H2O	6	0	0	0	0	0	0	0	0	6	0	0	0
165.983	185	Methylarsonite, 124-Trithiolane	4	HMDB12259, HMDB39433	CH5AsO2	M+ACN+H, M+ACN+H	1427	0	272	0	152	5	227	146	571	0	54	0	0
166.05	213.3	4-Pyridoxolactone, Formylanthranilic acid, 5-Pyridoxolactone, Noradrenochrome, 6-Methoxy-2(3H)-benzoxazolone, (R)-2-Hydroxy-2H-14-benzoxazin-3(4H)-one	4	HMDB03454, HMDB04089, HMDB04291, HMDB13030, HMDB36582, HMDB38318	C8H7NO3	M+H, M+H, M+H, M+H, M+H, M+H	4	0	0	0	0	0	0	0	0	0	4	0	0
166.073	42.8	7-Methylguanine, 3-Methylguanine, 1-Methylguanine, N2-Methylguanine	3	HMDB00897, HMDB01566, HMDB03282, HMDB06040	C6H7N5O	M+H, M+H, M+H, M+H	223	0	8	0	21	0	161	0	30	0	3	0	0
167.022	78.9	5-Hydroxyisourate	3	HMDB30097	C5H4N4O4	M+H-H2O	117	0	0	0	0	0	0	0	0	0	117	0	0
167.076	43.4	7-Methylguanine, 3-Methylguanine, 1-Methylguanine, N2-Methylguanine	3	HMDB00897, HMDB01566, HMDB03282, HMDB06040	C6H7N5O	M+H_[+1], M+H_[+1], M+H_[+1], M+H_[+1]	71	0	0	0	0	0	54	0	3	0	14	0	0
170.101	32.6	Pyridoxamine	3	HMDB01431	C8H12N2O2	M+H_[+1]	3	0	0	0	0	0	0	0	0	0	3	0	0
170.126	203	Unknown	5				2	0	0	0	0	0	0	0	0	0	2	0	0
170.97	55.6	2-Hydroxyethanesulfonate, Ethyl hydrogen sulfate	4	HMDB03903, HMDB31233	C2H6O4S	M+2Na-H, M+2Na-H	46	46	0	0	0	0	0	0	0	0	0	0	0
171.138	284.6	cis-4-Decenoic acid, trans-Dec-2-enoic acid, 8-Methylnonenoate, 5Z-Octenyl acetate, Methyl (xi)-3-nonenoate, ()-6-Methyl-5-hepten-2-yl acetate, 3-Decenoic acid, 9-Decenoic acid, 2-Octenyl acetate, Cyclohexylethyl acetate, Linalool oxide (trans-pyranoid), Linalool oxide III, 4-Hydroxy-26-dimethyl-7-octen-3-one, Ethyl 3-octenoate, 2-Methylbutyl 3-methyl-2-butenoate, 1-Octen-3-yl acetate, 6-Decanoli…	4	HMDB04980, HMDB10726, HMDB12183, HMDB29358, HMDB29859, HMDB30031, HMDB31002, HMDB31003, HMDB31297, HMDB31362, HMDB31440, HMDB31441, HMDB32119, HMDB32275, HMDB32393, HMDB32452, HMDB33203, HMDB33377, HMDB34427, HMDB34581, HMDB34880, HMDB35122, HMDB35365, HMDB35837, HMDB35839, HMDB35907, HMDB36099, HMDB36211, HMDB36990, HMDB36992, HMDB37021, HMDB37116, HMDB37217, HMDB37497, HMDB37632, HMDB38744, HMD…	C10H18O2	M+H, M+H, M+H, M+H, M+H, M+H, M+H, M+H, M+H, M+H, M+H, M+H, M+H, M+H, M+H, M+H, M+H, M+H, M+H, M+H, M+H, M+H, M+H, M+H, M+H, M+H, M+H, M+H, M+H, M+H, M+H, M+H, M+H, M+H, M+H, M+H, M+H, M+H, M+H, M+H, M+H, M+H, M+H, M+H, M+H, M+H, M+H, M+H, M+H, M+H	17	0	0	0	0	0	17	0	0	0	0	0	0
171.552	101.7	Grevilline A, Sterigmatocystin	4	HMDB29535, HMDB30588	C18H12O6	M+H+NH4, M+H+NH4	1	0	0	0	0	1	0	0	0	0	0	0	0
171.982	61	2-Acetylthiazole	4	HMDB32964	C5H5NOS	M+2Na-H	1	1	0	0	0	0	0	0	0	0	0	0	0
172.153	143.5	Unknown	5				86	0	0	0	0	0	86	0	0	0	0	0	0
174.043	96.9	Limocitrin, Aflatoxin G2a, Aflatoxin GM2, Spinacetin, 5678-Tetrahydroxy-34-dimethoxyflavone, Aflatoxin B1 diol	4	HMDB29516, HMDB30476, HMDB30478, HMDB30587, HMDB38466, HMDB60430	C17H14O8	M+2H, M+2H, M+2H, M+2H, M+2H, M+2H	1	0	0	0	0	0	1	0	0	0	0	0	0
175.002	40.8	Unknown	5				84	10	0	0	0	0	48	0	8	0	18	0	0
175.071	50.3	Formiminoglutamic acid	3	HMDB00854	C6H10N2O4	M+H	176	3	20	0	0	0	19	0	134	0	0	0	0
176.071	188.6	Indoleacetic acid, 5-Hydroxyindoleacetaldehyde, Hydroxymethyl indol-3-yl ketone, 1-Methoxy-1H-indole-3-carboxaldehyde	4	HMDB00197, HMDB04073, HMDB38628, HMDB40972	C10H9NO2	M+H, M+H, M+H, M+H	58	0	20	0	0	0	9	0	29	0	0	0	0
176.092	50.7	N-Carboxyethyl-g-aminobutyric acid, 2-Aminoheptanedioic acid, Calystegine B5, Calystegine B2	4	HMDB02201, HMDB34252, HMDB36383, HMDB38594	C7H13NO4	M+H, M+H, M+H, M+H	192	0	97	0	31	0	12	0	50	0	2	0	0
177	41.1	1-(2-Thienyl)-12-propanedione	4	HMDB40002	C7H6O2S	M+Na	51	1	0	0	0	0	46	0	0	0	4	0	0
177.127	277.3	4-Methyl-1-phenyl-2-pentanone, (S)-4-(4-Methylphenyl)-2-pentanone, Rhubafuran, 3-(4-Isopropylphenyl)propanal	4	HMDB31569, HMDB34177, HMDB36021, HMDB36171	C12H16O	M+H, M+H, M+H, M+H	1	1	0	0	0	0	0	0	0	0	0	0	0
177.952	85.1	Unknown	5				24	0	0	0	0	0	0	8	0	0	16	0	0
178.031	90.5	Brassicanal A	4	HMDB38591	C9H7NOS	M+H	1	0	0	0	0	0	0	0	0	0	1	0	0
178.933	49	Unknown	5				6	0	0	0	0	6	0	0	0	0	0	0	0
179.091	92.8	1-(2-Thienyl)-1-heptanone	3	HMDB40241	C11H16OS	M+H-H2O	9	0	0	0	0	0	0	9	0	0	0	0	0
180.042	46	4-Hydroxycyclophosphamide, 4-Hydroxyifosfamide, Fosfomycin, 54-Dihydroxy-33-dimethoxy-6:7-methylenedioxyflavone, 7-Chloro-6-demethylcepharadione B, N-Nitrosothiazolidine-4-carboxylic acid, Aldophosphamide, Aldoifosfamide	4	HMDB13856, HMDB13861, HMDB14966, HMDB29272, HMDB39757, HMDB40192, HMDB60433, HMDB60588	C7H15Cl2N2O3P	M+2ACN+2H, M+2ACN+2H, M+ACN+H, M+2H, M+H+NH4, M+NH4, M+2ACN+2H, M+2ACN+2H	11	0	0	0	0	0	0	0	0	0	11	0	0
180.983	65.3	cis-3-Chloroallyl aldehyde, trans-3-Chloroallyl aldehyde	4	HMDB60458, HMDB60516	C3H3ClO	2M+H, 2M+H	13	5	0	0	0	0	0	0	0	0	8	0	0
181.133	27.8	Dibucaine	4	HMDB14668	C20H29N3O2	M+H+NH4	1	0	0	0	0	0	0	0	0	0	1	0	0
182.985	290.6	Unknown	5				41	0	0	0	38	0	1	0	2	0	0	0	0
183.949	44.6	Unknown	5				142	0	105	0	0	0	0	0	0	0	37	0	0
184.944	45.7	Unknown	5				1	0	0	0	0	0	0	0	0	0	1	0	0
185.103	46.3	Carnitine	5	HMDB0000062	C7H16NO3	M+NA[1+]	1	0	1	0	0	0	0	0	0	0	0	0	0
185.165	28.9	1-Hexanol, 2-Ethoxybutane, 3-Hexanol, ()-3-Methyl-1-pentanol, Isohexanol	4	HMDB12971, HMDB31326, HMDB31493, HMDB33676, HMDB59889	C6H14O	M+2ACN+H, M+2ACN+H, M+2ACN+H, M+2ACN+H, M+2ACN+H	33	0	0	0	0	0	32	0	1	0	0	0	0
185.621	120.4	Norgestimate, Methyl (9Z)-8-oxo-68-diapo-6-carotenoate	4	HMDB15092, HMDB31979	C23H31NO3	M+2H, M+H+NH4	1	0	1	0	0	0	0	0	0	0	0	0	0
187.148	19.1	Rishitin, Kobusone, Isokobusone, (10betaH11xi)-11-Hydroxy-13-nor-6-eremophilen-8-one, Acetaldehyde butyl phenethyl acetal, 26-Di-tert-butyl-14-benzenediol	3	HMDB35593, HMDB36790, HMDB36791, HMDB37605, HMDB37820, HMDB40178	C14H22O2	M+H-2H2O, M+H-2H2O, M+H-2H2O, M+H-2H2O, M+H-2H2O, M+H-2H2O	13	0	1	10	0	0	0	0	0	0	2	0	0
189.978	41.2	Dimethyl trisulfide	4	HMDB13780	C2H6S3	M+ACN+Na	1	0	0	0	0	0	1	0	0	0	0	0	0
190.144	26.1	Unknown	5				251	0	0	0	4	0	240	0	4	0	3	0	0
191.077	178.5	(3-Nitroamino)alanine, Rutagravine, 1-Hydroxyrutacridone epoxide, 20-Hydroxyrutacridone epoxide	4	HMDB29398, HMDB33446, HMDB33520, HMDB33521	C3H7N3O4	M+ACN+H, M+ACN+2H, M+ACN+2H, M+ACN+2H	6	0	0	0	0	0	0	0	0	0	6	0	0
191.179	24.6	2-Methyl-2-phenyl-undecane, 1-Ethyl-35-diisopropyl-benzene	4	HMDB13820, HMDB59739	C14H22	M+H, M+H	4	0	0	0	0	0	0	0	0	0	4	0	0
192.04	40.9	Indole-3-carbinol, 1-(2-Furanylmethyl)-1H-pyrrole, 4-(2-Furanylmethylene)-34-dihydro-2H-pyrrole, 3-(2-Furanylmethyl)-1H-pyrrole, Barbituric acid, Phosphodimethylethanolamine	4	HMDB05785, HMDB30204, HMDB40009, HMDB40011, HMDB41833, HMDB60244	C9H9NO	M+2Na-H, M+2Na-H, M+2Na-H, M+2Na-H, M+ACN+Na, M+Na	79	78	0	0	0	0	0	0	0	0	1	0	0
192.065	35.7	5-Hydroxyindoleacetic acid	1	HMDB00763	C11H9NO2	M+H	360	0	258	0	5	0	14	1	43	0	39	0	0
192.074	128	Farnesyl pyrophosphate, 2-Hydroxyestrone sulfate, Carboxytolbutamide	4	HMDB00961, HMDB12622, HMDB41849	C15H28O7P2	M+2H, M+H+NH4, M+2ACN+2H	928	0	217	0	203	0	158	2	338	0	10	0	0
197.023	94.8	Unknown	5				7	7	0	0	0	0	0	0	0	0	0	0	0
198.98	54	1-(2-Thienyl)-12-propanedione	4	HMDB40002	C7H6O2S	M+2Na-H	2	2	0	0	0	0	0	0	0	0	0	0	0
198.986	48.1	Unknown	5				1	0	0	0	0	0	0	0	0	0	0	1	0
199.033	50.5	Chlorohydrin	4	HMDB35190	C13H9ClO	M+H-H2O	19	0	0	0	0	0	0	0	0	0	19	0	0
200.165	154.6	Oenanthic ether, Pelargonic acid, xi-2-Ethylheptanoic acid, Methyl caprylate, Heptyl acetate, 4-Methyloctanoic acid, Butyl 3-methylbutanoate, 3-Heptyl acetate, 5-Methylhexyl acetate, 3-Octyl formate, Pentyl butanoate, Propyl hexanoate, Hexyl propionate, 3-Methylbutyl 2-methylpropanoate, 1-Hydroxy-3-nonanone, 3-(Hydroxymethyl)-2-octanone, 4-Methyl-2-pentyl-13-dioxolane, 2-Methylpropyl 3-methylbuta…	4	HMDB00798, HMDB00847, HMDB30331, HMDB31291, HMDB31480, HMDB31557, HMDB32042, HMDB32309, HMDB32406, HMDB32454, HMDB34162, HMDB34165, HMDB34606, HMDB36234, HMDB37143, HMDB37164, HMDB37288, HMDB38040, HMDB38603, HMDB39216, HMDB39219, HMDB40221, HMDB40295, HMDB40430, HMDB59822	C9H18O2	M+ACN+H, M+ACN+H, M+ACN+H, M+ACN+H, M+ACN+H, M+ACN+H, M+ACN+H, M+ACN+H, M+ACN+H, M+ACN+H, M+ACN+H, M+ACN+H, M+ACN+H, M+ACN+H, M+ACN+H, M+ACN+H, M+ACN+H, M+ACN+H, M+ACN+H, M+ACN+H, M+ACN+H, M+ACN+H, M+ACN+H, M+ACN+H, M+ACN+H	3	0	0	0	3	0	0	0	0	0	0	0	0
201.045	86.8	Tiazuril, 1H-Pyrrolo21-c14thiazine	4	HMDB31833, HMDB40229	C17H14ClN3O2S	M+ACN+2H, M+ACN+Na	4	0	0	0	0	0	0	0	4	0	0	0	0
201.16	43.9	Spermine dialdehyde, Hexamethylene bisacetamide	4	HMDB13076, HMDB41901	C10H20N2O2	M+H, M+H	988	0	82	0	135	0	384	0	267	0	120	0	0
202	87.5	Unknown	5				2	0	0	0	0	0	0	0	0	0	2	0	0
202.163	44.6	3-Hydroxy-cis-5-tetradecenoylcarnitine, Oryzarol	4	HMDB13330, HMDB29458	C21H39NO5	M+H+NH4, M+2H	26	0	0	0	0	0	0	0	0	0	26	0	0
204.028	45.6	Unknown	5				10	10	0	0	0	0	0	0	0	0	0	0	0
204.154	70.8	Asymmetric dimethylarginine, Symmetric dimethylarginine	3	HMDB01539, HMDB03334	C8H18N4O2	M+H_[+1], M+H_[+1]	1	0	0	0	0	0	1	0	0	0	0	0	0
204.957	22.6	Unknown	5				3	0	0	0	0	0	0	0	0	0	3	0	0
205.068	61.7	Unknown	5				1	0	1	0	0	0	0	0	0	0	0	0	0
205.155	282.9	Hydroxy-trimethyl-lysine	5		C9H21N2O3+	M[1+]	314	0	41	0	1	0	23	8	237	0	4	0	0
207.043	114.5	Carboplatin, Benzoyl peroxide, (-)-3-(2-methyl-3-furyl)thio-2-butanone, 2456-Phenanthrenetetrol, Moracin M	4	HMDB15093, HMDB32040, HMDB32401, HMDB32866, HMDB33307	C6H12N2O4Pt	M+ACN+2H, M+H-2H2O, M+Na, M+H-2H2O, M+H-2H2O	7	0	0	0	0	0	0	0	0	0	7	0	0
207.072	61	O-Deethylated candesartan, Nedocromil	4	HMDB13842, HMDB14854	C22H16N6O3	M+2H, M+ACN+2H	7	0	7	0	0	0	0	0	0	0	0	0	0
208.014	43	4-Chlorocatechol	4	HMDB41810	C6H5ClO2	M+ACN+Na	7	7	0	0	0	0	0	0	0	0	0	0	0
208.022	93.2	Pterin, 2-Amino-3-carboxymuconic acid semialdehyde, Thialdine, 3-(Methylthio)methylthiophene, 2-Vinyl-4H-13-dithiine, 2-(Methylthio)-3H-phenoxazin-3-one, 2-Methyl-5-(methylthio)thiophene	4	HMDB00802, HMDB01330, HMDB31187, HMDB32429, HMDB34901, HMDB35996, HMDB40259	C6H5N5O	M+2Na-H, M+Na, M+2Na-H, M+ACN+Na, M+ACN+Na, M+H-2H2O, M+ACN+Na	8	0	0	0	0	0	0	0	0	8	0	0	0
209.128	28	Pentobarbital, Amobarbital	3	HMDB14457, HMDB15440	C11H18N2O3	M+H-H2O, M+H-H2O	11	0	0	0	0	0	0	0	0	0	11	0	0
209.934	265.4	Unknown	5				4	0	0	0	0	0	0	4	0	0	0	0	0
210.998	42.8	Selenocysteine, Methylselenic acid	4	HMDB03288, HMDB60489	C3H7NO2Se	M+ACN+H, M+2ACN+H	39	0	0	0	0	0	0	39	0	0	0	0	0
211.019	64.6	Unknown	5				10	0	0	0	0	0	10	0	0	0	0	0	0
212.128	25.9	Methoxamine, Orciprenaline, Isoproterenol	4	HMDB14861, HMDB14954, HMDB15197	C11H17NO3	M+H, M+H, M+H	67	0	0	0	0	0	0	0	0	0	67	0	0
212.979	42.6	Unknown	5				151	0	0	0	0	0	125	1	21	0	4	0	0
216.048	28.1	S-Methyl benzenecarbothioate, Brassicanal B	4	HMDB29694, HMDB38592	C8H8OS	M+ACN+Na, M+H-H2O	4	3	0	0	0	0	0	0	0	0	1	0	0
217.572	112.6	Unknown	5				3	0	0	0	0	0	0	0	3	0	0	0	0
218.965	41.5	Unknown	5				1	0	0	0	0	0	0	0	0	0	1	0	0
218.988	43.9	25-Dimethyl-3-(methyldithio)furan	4	HMDB40200	C7H10OS2	M+2Na-H	118	0	0	0	0	0	0	0	0	0	118	0	0
221.121	31.8	Pantothenic acid, Cis-zeatin	3	HMDB00210, HMDB12204	C9H17NO5	M+H_[+1], M+H_[+1]	4	0	2	0	1	0	1	0	0	0	0	0	0
221.153	23.5	Geranyl acetoacetate	3	HMDB38256	C14H22O3	M+H-H2O	4	4	0	0	0	0	0	0	0	0	0	0	0
226.946	62.9	Unknown	5				16	0	0	0	0	0	0	0	16	0	0	0	0
226.972	44.7	Unknown	5				77	0	9	0	0	0	0	68	0	0	0	0	0
227.075	113.5	5-Acetylamino-6-formylamino-3-methyluracil	4	HMDB11105	C8H10N4O4	M+H	24	0	0	0	24	0	0	0	0	0	0	0	0
227.126	33.5	Creatinine, Allixin, 34-Methylenesebacic acid	3	HMDB00562, HMDB40705, HMDB59729	C4H7N3O	2M+H, M+H, M+H	23	0	0	0	0	0	3	13	7	0	0	0	0
228.999	67	Unknown	5				3	0	0	0	0	0	1	1	1	0	0	0	0
229.118	65.3	Prolylhydroxyproline, Hydroxyprolyl-Proline, Prolyl-Hydroxyproline, Tetraacetylethylenediamine	4	HMDB06695, HMDB28871, HMDB29018, HMDB40573	C10H16N2O4	M+H, M+H, M+H, M+H	27	27	0	0	0	0	0	0	0	0	0	0	0
229.155	50.7	L-isoleucyl-L-proline, L-leucyl-L-proline, Isoleucyl-Proline, Leucyl-Proline	3	HMDB11174, HMDB11175, HMDB28915, HMDB28937	C11H20N2O3	M+H, M+H, M+H, M+H	107	0	0	0	0	0	0	103	4	0	0	0	0
229.236	19.5	Unknown	5				3	0	0	0	0	0	0	0	0	0	3	0	0
230.158	50.6	L-isoleucyl-L-proline, L-leucyl-L-proline, Isoleucyl-Proline, Leucyl-Proline	3	HMDB11174, HMDB11175, HMDB28915, HMDB28937	C11H20N2O3	M+H_[+1], M+H_[+1], M+H_[+1], M+H_[+1]	133	0	15	0	0	0	0	106	12	0	0	0	0
234.94	43.9	Unknown	5				54	0	0	0	0	0	1	0	0	0	53	0	0
235.01	50.7	5-Hydroxy-1-(4-sulfophenyl)-4-(E)-(4-sulfophenyl)diazenyl-1H-pyrazole-3-carboxylic acid	4	HMDB59914	C16H12N4O9S2	M+2H	9	9	0	0	0	0	0	0	0	0	0	0	0
236.891	58.9	Unknown	5				1	0	0	0	0	0	0	0	0	0	0	0	1
238.107	25.3	Salsoline-1-carboxylate, 3-Hydroxy-carbofuran	4	HMDB13067, HMDB32775	C12H15NO4	M+H, M+H	4	0	0	0	0	0	0	0	0	0	0	4	0
238.97	67.2	Unknown	5				12	0	0	0	12	0	0	0	0	0	0	0	0
240.152	32	Physostigmine, 7-(Methylthio)heptanenitrile, Erinacine D, 25-Acetylvulgaroside	4	HMDB15116, HMDB31890, HMDB31896, HMDB41365	C15H21N3O2	M+H-2H2O, M+2ACN+H, M+2H, M+2H	3	0	0	0	0	0	3	0	0	0	0	0	0
240.24	24	3-Methylcyclopentadecanone, ()-2-Dodecylcyclobutanone, Hexadecenal	3	HMDB34181, HMDB37544, HMDB60482	C16H30O	M+H_[+1], M+H_[+1], M+H_[+1]	5	0	0	0	3	0	0	0	0	1	0	1	0
240.91	131.7	Unknown	5				18	0	0	0	0	0	18	0	0	0	0	0	0
241.107	199.9	3-(345-Trimethoxyphenyl)propanoic acid, Ethyl 345-trimethoxybenzoate, Isopropyl 3-(34-dihydroxyphenyl)-2-hydroxypropanoate, 3-Carboxy-4-methyl-5-propyl-2-furanpropionic acid	4	HMDB30254, HMDB38627, HMDB41756, HMDB61112	C12H16O5	M+H, M+H, M+H, M+H	74	0	12	0	0	0	0	58	4	0	0	0	0
241.195	217.9	Unknown	5				4	0	4	0	0	0	0	0	0	0	0	0	0
241.216	142	9-Pentadecenoic acid, Isobutyl 10-undecenoate, Exaltolide, Butyl undecylenate, Rhodinyl isovalerate, Menthyl isovalerate, Citronellyl pentanoate, Citronellyl isovalerate, Auberganol, 155-Farnesanolide	4	HMDB29765, HMDB32347, HMDB34455, HMDB36426, HMDB37190, HMDB37211, HMDB37229, HMDB38954, HMDB39715, HMDB40997	C15H28O2	M+H, M+H, M+H, M+H, M+H, M+H, M+H, M+H, M+H, M+H	24	24	0	0	0	0	0	0	0	0	0	0	0
242.078	42	Moxonidine	4	HMDB41938	C9H12ClN5O	M+H	1	0	1	0	0	0	0	0	0	0	0	0	0
242.175	23.1	Dioscoretine	4	HMDB38588	C13H23NO3	M+H	182	0	0	0	0	0	18	0	106	0	58	0	0
242.175	199.4	Dioscoretine	4	HMDB38588	C13H23NO3	M+H	30	0	0	0	0	0	2	0	28	0	0	0	0
243.999	41.8	Unknown	5				1	0	0	0	0	0	0	0	0	0	0	1	0
245.083	57.2	3345-Tetrahydroxystilbene, Suberenone, (2E11Z)-Wyerone acid, Graveolone, 910-Dihydro-2357-Phenanthrenetetrol, (R)-Apiumetin, Eriobofuran	4	HMDB04215, HMDB30595, HMDB30946, HMDB33735, HMDB39430, HMDB40876, HMDB41016	C14H12O4	M+H, M+H, M+H, M+H, M+H, M+H, M+H	7	0	0	0	0	7	0	0	0	0	0	0	0
246.054	35.4	Lamivudine sulfoxide	4	HMDB60599	C8H11N3O4S	M+H	2	0	0	0	0	0	0	0	0	0	0	2	0
247.058	52.5	Elenolide, 4-Heptenal diethyl acetal, Sinapic acid, 23-Dimethylthiophene, 24-Dimethylthiophene, 25-Dimethylthiophene, 34-Dimethylthiophene, 3-(1-Hydroxymethyl-1-propenyl)pentanedioic acid, cis-Sinapic acid, 2-Amino-16-dimethylfuro32-eimidazo45-bpyridine, 2-Ethylthiophene, 3-Ethylthiophene, 5-(345-Trihydroxyphenyl)-gamma-valerolactone	4	HMDB30018, HMDB32306, HMDB32616, HMDB32977, HMDB32978, HMDB32979, HMDB32980, HMDB33092, HMDB34069, HMDB35175, HMDB35384, HMDB35385, HMDB41691	C11H12O5	M+Na, M+2Na-H, M+Na, 2M+Na, 2M+Na, 2M+Na, 2M+Na, M+2Na-H, M+Na, M+2Na-H, 2M+Na, 2M+Na, M+Na	101	0	0	0	15	0	16	0	7	0	63	0	0
250.804	154.7	Unknown	5				6	0	0	0	0	0	0	0	0	0	6	0	0
250.913	41.4	Unknown	5				76	2	0	0	0	0	63	0	4	0	7	0	0
250.983	41	Trimethylselenonium	4	HMDB42052	C3H9Se	2M+H	11	11	0	0	0	0	0	0	0	0	0	0	0
251.2	24.6	Norambreinolide, 3-Methyl-alpha-ionyl acetate, 22-Bis(2-methylpropoxy)ethylbenzene	4	HMDB35293, HMDB37631, HMDB37712	C16H26O2	M+H, M+H, M+H	21	0	0	0	0	0	0	0	0	0	21	0	0
252.232	238.8	Herculin	4	HMDB30275	C16H29NO	M+H	3	3	0	0	0	0	0	0	0	0	0	0	0
253.18	287.8	1-Hydroxyepiacorone, Acorusdiol, 3(4-5)-Abeo-411:412-diepoxy-3-eudesmanol, (4R5S7R11R)-1112-Dihydroxy-1(10)-spirovetiven-2-one, Apotrichodiol, 6alpha-Carissanol, alpha-Carissanol, Epioxylubimin, Dihydromyoporone, Piperalol, Zedoarondiol, Hydroxypelenolide, Toxin FS2, Urodiolenone, Bisacurone B, 23-Dihydroabscisic alcohol	4	HMDB30918, HMDB30919, HMDB32122, HMDB33149, HMDB34574, HMDB35309, HMDB35597, HMDB35613, HMDB35729, HMDB35767, HMDB36448, HMDB36663, HMDB37063, HMDB37969, HMDB38502, HMDB40685	C15H24O3	M+H, M+H, M+H, M+H, M+H, M+H, M+H, M+H, M+H, M+H, M+H, M+H, M+H, M+H, M+H, M+H	1	1	0	0	0	0	0	0	0	0	0	0	0
253.997	83	4-Chloro-1H-indole-3-acetic acid	4	HMDB32936	C10H8ClNO2	M+2Na-H	3	0	0	0	0	3	0	0	0	0	0	0	0
255.232	24.7	(R)-3-Hydroxy-hexadecanoic acid, (R)-2-Hydroxyhexadecanoic acid, 1-Heptanol, xi-3-Heptanol, Methyl hexyl ether, ()-2-Heptanol	4	HMDB10734, HMDB31057, HMDB31479, HMDB31481, HMDB32407, HMDB33908	C16H32O3	M+H-H2O, M+H-H2O, 2M+Na, 2M+Na, 2M+Na, 2M+Na	36	0	0	0	0	0	0	0	0	0	36	0	0
255.875	284	Unknown	5				1	0	0	1	0	0	0	0	0	0	0	0	0
257.247	24.5	Palmitic acid, Trimethyltridecanoic acid, Isopalmitic acid, Butyl dodecanoate, Dodecyl butyrate, Hexyl decanoate, Octyl octanoate, Ethyl tetradecanoate, Dodecyl 2-methylpropanoate, Hexadecanoate (n-C16:0)	3	HMDB00220, HMDB02396, HMDB31068, HMDB32065, HMDB32249, HMDB32324, HMDB33166, HMDB34153, HMDB36210, HMDB60083	C16H32O2	M+H, M+H, M+H, M+H, M+H, M+H, M+H, M+H, M+H, M+H	4	0	4	0	0	0	0	0	0	0	0	0	0
258.956	54.3	Unknown	5				3	0	0	0	0	0	1	0	0	1	1	0	0
259.104	44.5	Acadesine	5	HMDB0248071	C9H15N4O8P	M[1+]	55	0	0	0	0	0	0	54	1	0	0	0	0
260.054	56.8	Glucosamine-1P, Glucosamine 6-phosphate, Aminofructose 6-phosphate	4	HMDB01109, HMDB01254, HMDB60436	C6H14NO8P	M+H, M+H, M+H	46	0	0	0	0	0	0	36	4	0	6	0	0
260.08	77.1	Ketamine, Medicarpin 3-O-(6-malonylglucoside), 2-Amino-5-benzoylbenzimidazole	4	HMDB15352, HMDB38776, HMDB60711	C13H16ClNO	M+Na, M+2H, M+Na	2	2	0	0	0	0	0	0	0	0	0	0	0
261.037	282.8	Fructose 6-phosphate, Myo-inositol 1-phosphate, Galactose 1-phosphate, Dolichyl phosphate D-mannose, Fructose 1-phosphate, Mannose 6-phosphate, D-Myo-inositol 4-phosphate, Glucose 6-phosphate, Glucose 1-phosphate, Inositol phosphate, Beta-D-Glucose 6-phosphate, Beta-D-Fructose 6-phosphate, D-Tagatose 1-phosphate, D-Mannose 1-phosphate, Sorbose 1-phosphate, Beta-D-Fructose 2-phosphate, 1D-myo-Inos…	4	HMDB00124, HMDB00213, HMDB00645, HMDB00994, HMDB01076, HMDB01078, HMDB01313, HMDB01401, HMDB01586, HMDB02985, HMDB03498, HMDB03971, HMDB06328, HMDB06330, HMDB06797, HMDB06800, HMDB06814, HMDB06873, HMDB29219, HMDB60467	C6H13O9P	M+H, M+H, M+H, M+H, M+H, M+H, M+H, M+H, M+H, M+H, M+H, M+H, M+H, M+H, M+H, M+H, M+H, M+H, M+H, M+H	7	0	0	0	0	0	0	0	0	7	0	0	0
261.145	47.8	L-gamma-glutamyl-L-isoleucine, L-gamma-glutamyl-L-leucine	4	HMDB11170, HMDB11171	C11H20N2O5	M+H, M+H	31	0	0	0	0	0	0	0	0	0	31	0	0
261.988	169.6	Unknown	5				36	0	0	0	0	0	0	0	5	0	31	0	0
262.128	46.1	Methylmalonylcarnitine, Lotaustralin, Epidermin, Camelinin	4	HMDB13133, HMDB33865, HMDB34777, HMDB39082	C11H19NO6	M+H, M+H, M+H, M+H	1	1	0	0	0	0	0	0	0	0	0	0	0
262.797	114.3	Unknown	5				144	0	144	0	0	0	0	0	0	0	0	0	0
263.027	61.9	Liqcoumarin, 8-Hydroxy-2-methoxy-6-methyl-14-naphthoquinone, 4-Methylumbelliferyl acetate, Piperic acid	4	HMDB29518, HMDB30769, HMDB32989, HMDB33779	C12H10O4	M+2Na-H, M+2Na-H, M+2Na-H, M+2Na-H	51	1	49	0	1	0	0	0	0	0	0	0	0
264.038	41.8	Dimethylallylpyrophosphate, Isopentenyl pyrophosphate, 4-Chloro-35-dimethoxybenzaldehyde	4	HMDB01120, HMDB01347, HMDB40932	C5H12O7P2	M+NH4, M+NH4, M+ACN+Na	4	0	0	0	0	0	0	2	0	0	0	2	0
264.091	25.5	Tulobuterol	4	HMDB42056	C12H19Cl2NO	M+H	132	0	0	0	0	0	0	0	0	0	132	0	0
264.565	92	Garciduol C, Garciduol A	4	HMDB30279, HMDB41380	C27H18O9	M+ACN+2H, M+ACN+2H	10	10	0	0	0	0	0	0	0	0	0	0	0
265.09	68.3	3-Hydroxy-4-butanolide	4	HMDB34681	C10H16O8	M+H	35	0	0	0	12	0	22	0	0	0	1	0	0
265.12	54.7	Alpha-N-Phenylacetyl-L-glutamine	4	HMDB06344	C13H16N2O4	M+H	9	0	0	0	0	0	0	2	0	0	7	0	0
265.962	22	Unknown	5				9	0	0	0	6	0	0	0	0	0	3	0	0
266.123	95.5	D-1-(3-Carboxypropyl)amino-1-deoxyfructose	4	HMDB38663	C10H19NO7	M+H	3	3	0	0	0	0	0	0	0	0	0	0	0
266.928	126.9	Unknown	5				2	0	0	0	0	0	0	0	0	0	2	0	0
267.059	52.2	Unknown	5				38	0	0	0	0	0	0	38	0	0	0	0	0
267.11	46.5	(all-E)-179-Heptadecatriene-111315-triyne	4	HMDB31260	C17H18	M+2Na-H	80	0	0	0	0	0	0	80	0	0	0	0	0
268.227	19.9	Unknown	5				1	1	0	0	0	0	0	0	0	0	0	0	0
269.284	185.2	Stearaldehyde, Oleyl alcohol	4	HMDB02384, HMDB29632	C18H36O	M+H, M+H	24	0	0	0	0	0	23	0	0	0	0	1	0
270.064	91	N-Chloroacetyl-26-diethylaniline, 2-Furanmethanethiol, 2-Thiophenemethanol, 2-Methyl-3-furanthiol, Isomelitric acid A, 5-Methyl-3-furanthiol, Melitric acid A, 3-Thiophenemethanol	4	HMDB32855, HMDB32915, HMDB32993, HMDB36611, HMDB39523, HMDB39798, HMDB40681, HMDB41504	C12H16ClNO	M+2Na-H, 2M+ACN+H, 2M+ACN+H, 2M+ACN+H, M+2H, 2M+ACN+H, M+2H, 2M+ACN+H	8	8	0	0	0	0	0	0	0	0	0	0	0
273.167	52.8	Retinyl beta-glucuronide	4	HMDB10340	C26H38O7	M+2ACN+2H	17	0	0	0	0	0	17	0	0	0	0	0	0
275.009	92	4-Ketocyclophosphamide, 4-Ketoifosfamide	4	HMDB60686, HMDB60690	C7H13Cl2N2O3P	M+H, M+H	8	0	0	0	0	0	0	0	0	0	0	8	0
275.046	49.5	Deoxythymidine diphosphate-l-rhamnose	4	HMDB06354	C16H26N2O15P2	M+2H	1	1	0	0	0	0	0	0	0	0	0	0	0
276.001	46.6	4-Hydroxydiclofenac, 3-Hydroxydiclofenac, 5-Hydroxydiclofenac	4	HMDB13974, HMDB13976, HMDB60542	C14H11Cl2NO3	M+H-2H2O, M+H-2H2O, M+H-2H2O	11	11	0	0	0	0	0	0	0	0	0	0	0
277.179	28.4	Cyclandelate, 8-Shogaol, Panaquinquecol 2, Ginsenoyne C, Ginsenoyne K, Panaquinquecol 7	4	HMDB15586, HMDB31463, HMDB38938, HMDB38994, HMDB40375, HMDB41201	C17H24O3	M+H, M+H, M+H, M+H, M+H, M+H	322	0	138	0	11	0	0	0	4	0	156	13	0
277.887	43.6	Unknown	5				342	0	266	0	2	0	0	0	70	0	4	0	0
278.017	101.8	Mesoxalic acid	4	HMDB31522	C3H2O5	2M+ACN+H	13	0	0	0	0	0	0	0	0	0	13	0	0
280.012	98.8	Efavirenz	4	HMDB14763	C14H9ClF3NO2	M+H-2H2O	6	6	0	0	0	0	0	0	0	0	0	0	0
280.933	48.9	Unknown	5				7	0	0	0	0	0	7	0	0	0	0	0	0
281.051	264.9	N-Formylkynurenine, L-Formylkynurenine, 4-Hydroxyclobazam	4	HMDB01200, HMDB60485, HMDB60771	C11H12N2O4	M+2Na-H, M+2Na-H, M+H-2H2O	57	0	57	0	0	0	0	0	0	0	0	0	0
281.071	93.7	Sulfametopyrazine	4	HMDB14802	C11H12N4O3S	M+H	8	0	0	0	0	5	0	0	0	0	3	0	0
281.174	116.6	Prehumulinic acid, 6b-Hydroxy-8a-methoxy-7(11)-eremophilen-128-olide, 3b-Hydroxy-6b-methoxy-7(11)-eremophilen-128a-olide, Methyl (3b11x)-3-Hydroxy-8-oxo-6-eremophilen-12-oate	4	HMDB30148, HMDB36979, HMDB40755, HMDB41229	C16H24O4	M+H, M+H, M+H, M+H	2	0	0	0	0	0	0	0	0	0	2	0	0
282.871	58.5	Unknown	5				9	1	0	0	0	0	8	0	0	0	0	0	0
283.069	57.9	Niflumic Acid, 5-Hydroxy-4-methoxy-6-canthinone 3-N-oxide, Phenytoin quinone	4	HMDB15573, HMDB40794, HMDB60868	C13H9F3N2O2	M+H, M+H, M+H	3	0	0	0	0	0	0	0	0	0	3	0	0
283.175	31.9	Unknown	5				74	0	69	0	0	0	3	0	2	0	0	0	0
283.897	43.4	Unknown	5				46	0	0	0	0	0	0	0	0	0	46	0	0
285.132	26	2-Phenylethyl beta-D-glucopyranoside	4	HMDB29819	C14H20O6	M+H	6	0	0	0	0	0	0	0	0	0	6	0	0
286.888	56.3	Unknown	5				86	86	0	0	0	0	0	0	0	0	0	0	0
287.9	61	Unknown	5				1	1	0	0	0	0	0	0	0	0	0	0	0
288.075	90.9	Indomethacin acyl glucuronide	4	HMDB60922	C25H24ClNO10	M+ACN+2H	13	7	0	0	0	0	0	0	0	0	6	0	0
288.884	55.5	Unknown	5				79	79	0	0	0	0	0	0	0	0	0	0	0
289.897	61	Unknown	5				3	3	0	0	0	0	0	0	0	0	0	0	0
290.16	34.3	3-Methylglutarylcarnitine	4	HMDB00552	C13H23NO6	M+H	25	0	0	0	0	0	0	0	0	0	25	0	0
291.056	47.7	(S)-Ureidoglycolic acid, 5-(2-Carboxyethyl)-46-Dihydroxypicolinate, Chlormezanone	4	HMDB01005, HMDB06794, HMDB15309	C3H6N2O4	2M+Na, M+ACN+Na, M+NH4	6	0	0	0	0	6	0	0	0	0	0	0	0
297.242	25.3	13S-hydroxyoctadecadienoic acid, Alpha-dimorphecolic acid, 910-Epoxyoctadecenoic acid, 1213-EpOME, 9-HODE, (Z)-13-Oxo-9-octadecenoic acid, Avenoleic acid, 12-Hydroxy-810-octadecadienoic acid	4	HMDB04667, HMDB04670, HMDB04701, HMDB04702, HMDB10223, HMDB29796, HMDB29978, HMDB29998	C18H32O3	M+H, M+H, M+H, M+H, M+H, M+H, M+H, M+H	1	0	0	0	0	0	0	0	0	0	1	0	0
298.115	44.2	1-Methylguanosine, 2-Methylguanosine, 3-O-Methylguanosine, Nelarabine	4	HMDB01563, HMDB05862, HMDB06038, HMDB15401	C11H15N5O5	M+H, M+H, M+H, M+H	39	0	0	0	0	0	11	0	0	0	28	0	0
300.201	30.3	Unknown	5				6	0	0	0	0	0	4	0	2	0	0	0	0
300.261	160.1	Unknown	5				7	7	0	0	0	0	0	0	0	0	0	0	0
301.072	73.1	Temazepam, Clobazam, 337-Trihydroxy-4-methoxyflavone, Diosmetin, Pratensein, Takakin, Chrysoeriol, Barpisoflavone A, Cajanin, 35-Dihydroxy-67-methylenedioxyflavanone, 6alpha-Hydroxymaackiain, Santal, Questinol, Luteolin 7-methyl ether, Kaempferide, Tectorigenin	4	HMDB14376, HMDB14493, HMDB29492, HMDB29676, HMDB30617, HMDB30659, HMDB30667, HMDB32695, HMDB32696, HMDB33321, HMDB33720, HMDB33760, HMDB34443, HMDB37339, HMDB37441, HMDB42024	C16H13ClN2O2	M+H, M+H, M+H, M+H, M+H, M+H, M+H, M+H, M+H, M+H, M+H, M+H, M+H, M+H, M+H, M+H	1	0	0	0	0	0	0	0	0	0	1	0	0
301.265	209.9	Unknown	5				5	0	0	0	0	0	0	0	0	0	5	0	0
301.555	101.7	Unknown	5				2	0	0	0	0	0	2	0	0	0	0	0	0
302.899	271.6	Unknown	5				2	0	0	0	0	0	0	0	0	0	2	0	0
304.101	51.5	Gynocardin	4	HMDB29913	C12H17NO8	M+H	6	0	0	0	0	0	0	0	0	0	6	0	0
306.002	58.6	Unknown	5				99	0	0	0	0	0	0	99	0	0	0	0	0
306.019	50.8	Unknown	5				239	0	239	0	0	0	0	0	0	0	0	0	0
308.83	281.9	Unknown	5				47	0	0	0	0	0	0	0	0	0	47	0	0
309.111	66.6	Warfarin, Bisdemethoxycurcumin, Kanzonol U, Moracin D, Moracin E, Moracin G, (1S2R3S)-23-Dihydro-4-(4-hydroxyphenyl)-1H-phenalene-123-triol, Glyinflanin H	4	HMDB01935, HMDB02114, HMDB29789, HMDB33312, HMDB33313, HMDB33314, HMDB37109, HMDB41303	C19H16O4	M+H, M+H, M+H, M+H, M+H, M+H, M+H, M+H	62	0	0	0	0	0	0	0	0	0	62	0	0
309.206	144.3	Hexadecanedioic acid, 5(6)-Pentyl-14-dioxan-2-one, 16-Hydroxy-10-oxohexadecanoic acid, 224-Trimethyl-13-pentadienol diisobutyrate	4	HMDB00672, HMDB37146, HMDB41287, HMDB59777	C16H30O4	M+Na, M+H-2H2O, M+Na, M+Na	6	0	0	0	0	0	0	0	0	6	0	0	0
313.052	45.9	Diclofenac, Meclofenamic acid, Diazoxide, Cefonicid	4	HMDB14724, HMDB15074, HMDB15251, HMDB15423	C14H11Cl2NO2	M+NH4, M+NH4, M+2ACN+H, M+2ACN+2H	45	0	0	0	0	0	15	0	0	0	30	0	0
314.847	241.8	Unknown	5				10	0	0	0	0	0	0	0	0	0	10	0	0
314.942	47.8	Unknown	5				19	0	0	0	0	0	3	0	7	0	9	0	0
315.13	62.4	L-Menthone 12-glycerol ketal, meta-O-Dealkylated flecainide	4	HMDB32367, HMDB60831	C16H15N3OS	M+NH4, M+H-H2O	13	0	0	0	0	0	0	0	0	0	13	0	0
315.272	208.2	Unknown	5				1	1	0	0	0	0	0	0	0	0	0	0	0
317.041	69.9	Wasalexin A, Wasalexin B, Methoxybrassenin B	3	HMDB34765, HMDB34768, HMDB38636	C13H14N2O2S2	M+Na, M+Na, M+Na	7	0	0	0	0	0	0	0	0	7	0	0	0
320.076	49.7	N-Gluconyl ethanolamine phosphate	3	HMDB32294	C8H18NO10P	M+H	608	16	0	0	96	0	255	7	197	5	32	0	0
320.096	43.6	Nicotinate D-ribonucleoside, Fludiazepam, Benzyl glycinate 4-methylbenzenesulfonate salt, D-Erythroascorbic acid 1-a-D-xylopyranoside, Delphinidin 3-sambubioside, Pyrogallol-2-O-glucuronide	4	HMDB06809, HMDB15513, HMDB33374, HMDB33626, HMDB38003, HMDB60017	C11H14NO6	M+ACN+Na, M+NH4, M+H-H2O, M+ACN+H, M+ACN+2H, M+NH4	1	0	0	0	0	0	0	0	0	0	1	0	0
320.918	44.6	Unknown	5				19	0	0	0	0	0	0	0	0	0	19	0	0
321.06	39.5	trans-334557-Hexahydroxyflavanone	3	HMDB30835	C15H12O8	M+H	84	0	0	0	0	0	3	77	4	0	0	0	0
321.079	49	N-Gluconyl ethanolamine phosphate	3	HMDB32294	C8H18NO10P	M+H_[+1]	490	37	1	0	0	0	237	10	200	0	5	0	0
322.074	49	Beta-Citryl-L-glutamic acid	4	HMDB13220	C11H15NO10	M+H	9	0	0	0	0	0	0	8	1	0	0	0	0
323.029	96.8	Cinnabarinic acid	5	HMDB0004078	C14H8N2O6	M+NA[1+]	1	0	0	0	0	0	0	0	1	0	0	0	0
323.082	75.4	Unknown	5				5	0	0	0	0	0	0	0	0	0	5	0	0
324.289	202.8	Linoleoyl ethanolamide	4	HMDB12252	C20H37NO2	M+H	2	0	0	2	0	0	0	0	0	0	0	0	0
328.139	39.6	N-(1-Deoxy-1-fructosyl)phenylalanine	4	HMDB37846	C15H21NO7	M+H	5	0	0	5	0	0	0	0	0	0	0	0	0
328.256	24.7	1-Acetoxy-2-hydroxy-16-heptadecen-4-one, Avocadyne 2-acetate, Avocadyne 1-acetate, Avocadyne 4-acetate	3	HMDB31006, HMDB31047, HMDB31048, HMDB31049	C19H34O4	M+H_[+1], M+H_[+1], M+H_[+1], M+H_[+1]	1	0	0	0	0	0	0	0	0	1	0	0	0
328.292	24.4	Unknown	5				6	0	0	0	0	0	0	0	0	6	0	0	0
328.934	58.4	Unknown	5				3	3	0	0	0	0	0	0	0	0	0	0	0
329.092	68.8	Rubroskyrin	4	HMDB30865	C30H22O12	M+2ACN+2H	1	1	0	0	0	0	0	0	0	0	0	0	0
331.147	173.1	Tyramine glucuronide, Voglibose, 1-Hydroxy-6-methoxypyrene	4	HMDB10328, HMDB15598, HMDB60321	C14H19NO7	M+NH4, M+ACN+Na, M+2ACN+H	349	0	336	0	0	0	0	10	2	0	1	0	0
331.284	25.9	MG(0:016:00:0), MG(16:00:00:0), Glycerol 1-hexadecanoate	3	HMDB11533, HMDB11564, HMDB31074	C19H38O4	M+H, M+H, M+H	6	0	0	0	0	0	0	0	0	6	0	0	0
333.987	76.3	Unknown	5				25	0	0	0	0	0	0	0	0	0	25	0	0
334.915	254.6	Liothyronine, Reverse-triiodthyronine	4	HMDB00265, HMDB60074	C15H12I3NO4	M+H+NH4, M+H+NH4	39	0	0	0	0	0	2	0	0	0	37	0	0
334.985	73.4	Unknown	5				7	0	0	0	0	0	0	0	0	0	7	0	0
337.274	194.5	Pregnanetriol, 3-Methyl-5-pentyl-2-furanundecanoic acid, Isolinderanolide	4	HMDB06070, HMDB31005, HMDB38105	C21H36O3	M+H, M+H, M+H	1	0	1	0	0	0	0	0	0	0	0	0	0
338.889	62.7	Unknown	5				9	0	0	0	0	0	0	0	0	0	9	0	0
340.275	192.2	PE(15:0P-16:0), PE(P-16:015:0), Aprindine, lysoPC(28:1(5Z))	4	HMDB08916, HMDB11337, HMDB15498, HMDB29221	C36H72NO7P	M+H+NH4, M+H+NH4, M+NH4, M+H+NH4	2	0	0	0	0	0	0	0	2	0	0	0	0
342.95	47.1	Unknown	5				7	0	7	0	0	0	0	0	0	0	0	0	0
342.967	62.1	235-Trichloromaleylacetate	4	HMDB60361	C6H3Cl3O5	M+2ACN+H	3	0	3	0	0	0	0	0	0	0	0	0	0
344.096	70.3	DIBOA-Glc, DHBOA-Glc	4	HMDB33734, HMDB37261	C14H17NO9	M+H, M+H	214	0	175	0	29	0	0	0	1	0	9	0	0
344.846	55.5	Unknown	5				54	54	0	0	0	0	0	0	0	0	0	0	0
345	47.8	Chloramphenicol, 411-Dichloro-512-dihydroquino23-bacridine-714-dione	4	HMDB14589, HMDB37810	C11H12Cl2N2O5	M+Na, M+H-2H2O	41	0	0	0	0	0	0	0	0	0	41	0	0
345.947	49.5	Unknown	5				5	0	0	0	0	0	0	0	0	0	0	5	0
346.132	67.6	7-Hydroxy-6-methyl-8-ribityl lumazine	4	HMDB04256	C12H16N4O7	M+NH4	465	0	2	0	48	0	0	0	400	0	15	0	0
346.842	55.5	Chlorthal	4	HMDB29628	C8H2Cl4O4	M+2Na-H	200	89	0	0	0	0	50	0	61	0	0	0	0
348.996	44.1	5-(345-Trihydroxyphenyl)-gamma-valerolactone-3-O-sulphate, 5-(345-Trihydroxyphenyl)-gamma-valerolactone-4-O-sulphate, Sinapinic acid-O-sulphate	4	HMDB59985, HMDB59987, HMDB60020	C11H12O8S	M+2Na-H, M+2Na-H, M+2Na-H	2	0	0	0	0	0	2	0	0	0	0	0	0
353.593	251.6	Clofazimine glucuronide	4	HMDB61133	C33H30Cl2N4O7	M+ACN+2H	3	0	3	0	0	0	0	0	0	0	0	0	0
354.033	40.4	Progoitrin	4	HMDB34071	C11H19NO10S2	M+H-2H2O	13	0	0	0	0	0	13	0	0	0	0	0	0
354.894	57.8	Unknown	5				1	0	0	0	0	0	1	0	0	0	0	0	0
355.07	282	norsertraline	4	HMDB61002	C16H15Cl2N	M+ACN+Na	9	0	0	0	0	0	0	0	0	0	9	0	0
355.11	70.5	Flumioxazin, 4-(4-Chlorophenyl)-1-4-(4-fluorophenyl)-4-oxobutyl-pyridinium (HPP)	4	HMDB34854, HMDB61000	C19H15FN2O4	M+H, M+H	66	0	66	0	0	0	0	0	0	0	0	0	0
355.284	24.6	MG(0:018:2(9Z12Z)0:0), MG(18:2(9Z12Z)0:00:0)	3	HMDB11538, HMDB11568	C21H38O4	M+H, M+H	3	0	0	0	0	0	0	0	0	3	0	0	0
356.078	158.2	Clorazepate, Cordeauxione, N-(1-Deoxy-1-fructosyl)methionine	4	HMDB14766, HMDB34310, HMDB37841	C16H11ClN2O3	M+ACN+H, M+ACN+Na, M+2Na-H	2	0	0	0	0	0	0	0	0	0	2	0	0
356.881	59.8	Unknown	5				4	0	0	0	0	0	0	0	0	0	4	0	0
357.028	50.4	Bissulfine, SS-Ethylidene dithioacetate, S-2-Propenyl 2-propene-1-sulfonothioate, 5-(345-Trihydroxyphenyl)-gamma-valerolactone-O-methyl-O-sulphate, Urate radical	4	HMDB30000, HMDB37553, HMDB39940, HMDB60029, HMDB60260	C6H10O2S2	2M+H, 2M+H, 2M+H, M+Na, 2M+Na	4	0	0	0	0	4	0	0	0	0	0	0	0
357.896	45	Unknown	5				135	0	12	0	120	0	0	0	0	0	1	2	0
359.315	25.2	MG(18:00:00:0), MG(0:018:00:0), Glycerol 1-octadecanoate	3	HMDB11131, HMDB11535, HMDB31075	C21H42O4	M+H, M+H, M+H	14	0	0	0	0	0	0	0	0	13	0	1	0
359.962	44.8	Methyclothiazide	4	HMDB14377	C9H11Cl2N3O4S2	M+H	2	2	0	0	0	0	0	0	0	0	0	0	0
360.161	96.9	Kyotorphin, Arginyl-Tyrosine, Tyrosyl-Arginine, L-Hexahydro-3-imino-124-oxadiazepine-3-carboxylic acid, Clozapine N-oxide	4	HMDB05768, HMDB28721, HMDB29099, HMDB30402, HMDB60900	C15H23N5O4	M+Na, M+Na, M+Na, 2M+ACN+H, M+NH4	23	0	0	0	0	0	0	0	0	0	23	0	0
360.319	25.1	MG(18:00:00:0), MG(0:018:00:0), Glycerol 1-octadecanoate	3	HMDB11131, HMDB11535, HMDB31075	C21H42O4	M+H_[+1], M+H_[+1], M+H_[+1]	6	0	0	0	0	0	0	0	0	6	0	0	0
361.322	24.9	MG(18:00:00:0), MG(0:018:00:0), Glycerol 1-octadecanoate	3	HMDB11131, HMDB11535, HMDB31075	C21H42O4	M+H_[+2], M+H_[+2], M+H_[+2]	9	0	0	0	0	0	0	0	0	9	0	0	0
365.908	48.3	Unknown	5				1	1	0	0	0	0	0	0	0	0	0	0	0
369.135	91	Curcumin, Integrin, Artocarpetin A, Cyclointegrin, Cyclocurcumin, Mollicellin H, 9-O-Methylglyceofuran, Glycyrrhizaisoflavone C, Glicoricone, Glycycoumarin, Gancaonin B, Gancaonin N, Isoglycycoumarin	4	HMDB02269, HMDB29486, HMDB30467, HMDB30686, HMDB33086, HMDB33344, HMDB34112, HMDB35526, HMDB36324, HMDB38225, HMDB38488, HMDB38528, HMDB38873	C21H20O6	M+H, M+H, M+H, M+H, M+H, M+H, M+H, M+H, M+H, M+H, M+H, M+H, M+H	5	0	0	0	0	0	0	0	0	0	5	0	0
369.263	24.6	Cortol, Beta-Cortol, Glycerol trihexanoate, Mangalkanyl glucoside, gamma-Eudesmol rhamnoside, Cryptomeridiol 11-rhamnoside	3	HMDB03180, HMDB05821, HMDB31125, HMDB36015, HMDB37961, HMDB38018	C21H36O5	M+H, M+H, M+H-H2O, M+H-H2O, M+H, M+H-H2O	8	0	0	0	0	0	0	0	0	8	0	0	0
375.907	50.9	Unknown	5				8	0	0	0	0	0	0	0	0	0	8	0	0
378.026	64.9	Unknown	5				1	0	0	0	0	0	0	0	0	0	1	0	0
380.897	49.7	3-(Dichloromethylene)-25-pyrrolidinedione	4	HMDB34895	C5H3Cl2NO2	2M+Na	143	0	0	0	139	0	1	0	3	0	0	0	0
383.116	62.3	Mollicellin A, Mollicellin B, Artonin K	4	HMDB33339, HMDB33340, HMDB40673	C21H18O7	M+H, M+H, M+H	1	0	0	0	0	0	0	0	0	0	1	0	0
384.318	24.3	MG(0:020:2(11Z14Z)0:0), MG(20:2(11Z14Z)0:00:0), Persenone B, Lepidiumterpenyl ester	3	HMDB11544, HMDB11574, HMDB35959, HMDB36865	C23H42O4	M+H_[+1], M+H_[+1], M+H_[+1], M+H_[+1]	6	0	0	0	0	0	0	0	0	6	0	0	0
385.13	73.4	S-Adenosylhomocysteine	1	HMDB00939	C14H20N6O5S	M+H	1	0	1	0	0	0	0	0	0	0	0	0	0
385.278	24.5	7b-Hydroxy-3-oxo-5b-cholanoic acid, DG(20:5(5Z8Z11Z14Z17Z)22:6(4Z7Z10Z13Z16Z19Z)0:0), DG(22:6(4Z7Z10Z13Z16Z19Z)20:5(5Z8Z11Z14Z17Z)0:0), PC(14:020:5(5Z8Z11Z14Z17Z)), PC(14:1(9Z)20:4(5Z8Z11Z14Z)), PC(14:1(9Z)20:4(8Z11Z14Z17Z)), PC(16:1(9Z)18:4(6Z9Z12Z15Z)), PC(18:4(6Z9Z12Z15Z)16:1(9Z)), PC(20:4(5Z8Z11Z14Z)14:1(9Z)), PC(20:4(8Z11Z14Z17Z)14:1(9Z)), PC(20:5(5Z8Z11Z14Z17Z)14:0), PE(15:022:5(4Z7Z10Z13Z1…	4	HMDB00541, HMDB07585, HMDB07781, HMDB07885, HMDB07916, HMDB07917, HMDB08009, HMDB08233, HMDB08427, HMDB08460, HMDB08492, HMDB08911, HMDB08912, HMDB09615, HMDB09648, HMDB11557, HMDB11587, HMDB56383	C25H38O4	M+H-H2O, M+2ACN+2H, M+2ACN+2H, M+H+NH4, M+H+NH4, M+H+NH4, M+H+NH4, M+H+NH4, M+H+NH4, M+H+NH4, M+H+NH4, M+H+NH4, M+H+NH4, M+H+NH4, M+H+NH4, M+H-H2O, M+H-H2O, M+2ACN+2H	12	0	0	0	0	0	0	0	0	12	0	0	0
385.346	288.2	5-b-Cholestane-3a 7a 12a-triol, 3b5a6b-Cholestanetriol, 3 alpha7 alpha26-Trihydroxy-5beta-cholestane, (3alpha5alpha22R23R)-Cholestane-32223-triol, 5beta-Cholestane-3alpha7alpha27-triol	4	HMDB01457, HMDB03990, HMDB12455, HMDB39463, HMDB60138	C27H48O3	M+H-2H2O, M+H-2H2O, M+H-2H2O, M+H-2H2O, M+H-2H2O	3	0	0	0	0	0	0	0	0	0	3	0	0
386.349	151.4	Unknown	5				5	0	0	0	0	0	0	0	0	0	5	0	0
387.31	25.1	PC(15:0P-18:0), PE(18:0P-18:0), PE(20:0P-16:0), PE(20:1(11Z)P-18:1(11Z)), PE(20:1(11Z)P-18:1(9Z)), PE(20:2(11Z14Z)P-18:0), PE(22:2(13Z16Z)P-16:0), PC(P-18:015:0), PE(P-16:020:0), PE(P-16:022:2(13Z16Z)), PE(dm18:018:0), PE(P-18:020:2(11Z14Z)), PE(P-18:1(11Z)20:1(11Z)), PE(P-18:1(9Z)20:1(11Z))	4	HMDB07962, HMDB09016, HMDB09246, HMDB09281, HMDB09282, HMDB09313, HMDB09576, HMDB11238, HMDB11347, HMDB11357, HMDB11373, HMDB11382, HMDB11414, HMDB11447	C41H82NO7P	M+ACN+2H, M+ACN+2H, M+ACN+2H, M+H+NH4, M+H+NH4, M+H+NH4, M+H+NH4, M+ACN+2H, M+ACN+2H, M+H+NH4, M+ACN+2H, M+H+NH4, M+H+NH4, M+H+NH4	4	0	0	0	0	0	0	0	0	4	0	0	0
387.347	25.1	DG(18:0e2:00:0), MG(0:020:00:0), MG(20:00:00:0)	3	HMDB11147, HMDB11542, HMDB11572	C23H46O4	M+H, M+H, M+H	9	0	0	0	0	0	0	0	0	9	0	0	0
388.35	25	DG(18:0e2:00:0), MG(0:020:00:0), MG(20:00:00:0)	3	HMDB11147, HMDB11542, HMDB11572	C23H46O4	M+H_[+1], M+H_[+1], M+H_[+1]	1	0	0	0	0	0	0	0	0	1	0	0	0
390.725	58.5	Unknown	5				16	0	0	0	15	0	0	0	1	0	0	0	0
390.974	40.1	Unknown	5				2	0	0	0	0	0	0	0	2	0	0	0	0
392.916	50.7	Unknown	5				90	0	11	0	1	0	0	0	2	0	76	0	0
392.957	47.4	Unknown	5				94	0	0	0	0	0	82	0	12	0	0	0	0
393.055	61.9	2-Amino-3-carboxymuconic acid semialdehyde, Suillusin	4	HMDB01330, HMDB37371	C7H7NO5	2M+Na, M+Na	41	1	0	0	0	0	40	0	0	0	0	0	0
396.872	49.5	Unknown	5				153	0	0	0	104	0	0	0	0	5	44	0	0
401.099	100.9	Myricetin, 28-Dihydroxyquinoline-beta-D-glucuronide, 3-Indole carboxylic acid glucuronide, Felodipine, Brinzolamide, Cyanidin 3-O-dimalonyl-laminaribioside, Xanthoxylol, Cubebin, Licoagrodione, 4-O-Methylgalactinol, Kievitone, Galactopinitol B, Licofuranone, 334558-Hexahydroxyflavone, 5-Deoxykievitol, (-)-Epigallocatechin 3-cinnamate, Galactopinitol A, Kinobeon A, 18-Dihydroxy-35-dimethoxy-2-pren…	4	HMDB02755, HMDB11658, HMDB13189, HMDB15158, HMDB15325, HMDB29242, HMDB29459, HMDB30682, HMDB33027, HMDB33558, HMDB34213, HMDB35321, HMDB35525, HMDB37357, HMDB38774, HMDB38831, HMDB39475, HMDB41123, HMDB41290, HMDB41441, HMDB41487	C15H10O8	M+2ACN+H, M+ACN+Na, M+ACN+Na, M+NH4, M+NH4, M+H+NH4, M+2Na-H, M+2Na-H, M+2Na-H, M+2Na-H, M+2Na-H, M+2Na-H, M+2Na-H, M+2ACN+H, M+2Na-H, M+H-2H2O, M+2Na-H, M+2Na-H, M+2Na-H, M+Na, M+2Na-H	2	0	0	0	0	0	0	0	0	0	2	0	0
401.82	60.9	PC(15:022:1(13Z)), PC(22:1(13Z)15:0), PE(16:024:1(15Z)), PE(16:1(9Z)24:0), PE(18:022:1(13Z)), PE(18:1(11Z)22:0), PE(18:1(9Z)22:0), PE(20:020:1(11Z)), PE(20:1(11Z)20:0), PE(22:018:1(11Z)), PE(22:018:1(9Z)), PE(22:1(13Z)18:0), PE(24:016:1(9Z)), PE(24:1(15Z)16:0), Culinariside	4	HMDB07952, HMDB08560, HMDB08948, HMDB08980, HMDB09007, HMDB09039, HMDB09072, HMDB09230, HMDB09262, HMDB09487, HMDB09488, HMDB09519, HMDB09716, HMDB09748, HMDB35402	C45H88NO8P	M+2H, M+2H, M+2H, M+2H, M+2H, M+2H, M+2H, M+2H, M+2H, M+2H, M+2H, M+2H, M+2H, M+2H, M+2H	1	1	0	0	0	0	0	0	0	0	0	0	0
403.817	60.6	Unknown	5				2	2	0	0	0	0	0	0	0	0	0	0	0
405.061	91.5	()-12a-Hydroxypachyrrhizone, 7-Chloro-6-demethylcepharadione B	4	HMDB30774, HMDB39757	C20H14O8	M+Na, M+ACN+Na	1	1	0	0	0	0	0	0	0	0	0	0	0
407.811	61	Araliacerebroside	4	HMDB33621	C40H77NO10	M+2ACN+2H	21	0	0	0	0	0	0	21	0	0	0	0	0
408.931	47.8	Unknown	5				61	7	0	0	0	0	54	0	0	0	0	0	0
411.347	24.3	MG(0:022:2(13Z16Z)0:0), MG(22:2(13Z16Z)0:00:0)	4	HMDB11553, HMDB11583	C25H46O4	M+H, M+H	5	0	0	0	0	0	0	0	0	5	0	0	0
413.142	41.2	Methylpicraquassioside A, N6-Carbamoyl-L-threonyladenosine	4	HMDB38347, HMDB41623	C19H24O10	M+H, M+H	1	1	0	0	0	0	0	0	0	0	0	0	0
414.145	40.6	Amisulpride	4	HMDB15633	C17H27N3O4S	M+2Na-H	6	6	0	0	0	0	0	0	0	0	0	0	0
418.967	44.5	Unknown	5				19	19	0	0	0	0	0	0	0	0	0	0	0
419.315	25.6	11-Carboxy-alpha-chromanol, Hexadecyl ferulate	4	HMDB12515, HMDB39317	C26H42O4	M+H, M+H	14	0	0	0	14	0	0	0	0	0	0	0	0
420.319	285.4	PE(18:1(11Z)22:2(13Z16Z)), PE(18:1(9Z)22:2(13Z16Z)), PE(18:2(9Z12Z)22:1(13Z)), PE(18:3(6Z9Z12Z)22:0), PE(18:3(9Z12Z15Z)22:0), PE(18:4(6Z9Z12Z15Z)24:1(15Z)), PE(20:020:3(5Z8Z11Z)), PE(20:020:3(8Z11Z14Z)), PE(20:022:5(4Z7Z10Z13Z16Z)), PE(20:022:5(7Z10Z13Z16Z19Z)), PE(20:1(11Z)20:2(11Z14Z)), PE(20:1(11Z)22:4(7Z10Z13Z16Z)), PE(20:2(11Z14Z)20:1(11Z)), PE(20:3(5Z8Z11Z)20:0), PE(20:3(5Z8Z11Z)22:2(13Z16Z…	4	HMDB09041, HMDB09074, HMDB09106, HMDB09138, HMDB09171, HMDB09212, HMDB09232, HMDB09233, HMDB09241, HMDB09242, HMDB09264, HMDB09273, HMDB09296, HMDB09328, HMDB09338, HMDB09361, HMDB09371, HMDB09403, HMDB09436, HMDB09468, HMDB09490, HMDB09491, HMDB09500, HMDB09522, HMDB09531, HMDB09532, HMDB09553, HMDB09554, HMDB09562, HMDB09563, HMDB09593, HMDB09625, HMDB09658, HMDB09756, HMDB32001, HMDB32031	C45H84NO8P	M+ACN+2H, M+ACN+2H, M+ACN+2H, M+ACN+2H, M+ACN+2H, M+H+NH4, M+ACN+2H, M+ACN+2H, M+H+NH4, M+H+NH4, M+ACN+2H, M+H+NH4, M+ACN+2H, M+ACN+2H, M+H+NH4, M+ACN+2H, M+H+NH4, M+H+NH4, M+H+NH4, M+H+NH4, M+ACN+2H, M+ACN+2H, M+H+NH4, M+ACN+2H, M+H+NH4, M+H+NH4, M+ACN+2H, M+ACN+2H, M+H+NH4, M+H+NH4, M+H+NH4, M+H+NH4, M+H+NH4, M+H+NH4, M+2Na-H, M+2Na-H	84	0	0	0	2	0	0	0	12	0	70	0	0
426.934	63.1	Unknown	5				6	0	0	0	0	1	0	0	0	0	5	0	0
427.076	115.9	Guanosine monophosphate, 8-Oxo-dGMP, Cyclic pyranopterin monophosphate	4	HMDB01397, HMDB11670, HMDB59639	C10H14N5O8P	M+ACN+Na, M+ACN+Na, M+ACN+Na	77	0	0	0	1	0	0	0	76	0	0	0	0
428.083	118.1	Malonyl-CoA semialdehyde, Glucose isomerase from streptomyces rubiginosus, Phosphocreatinine	4	HMDB02170, HMDB32295, HMDB41624	C24H38N7O18P3S	M+H+NH4, M+ACN+Na, 2M+ACN+H	2	2	0	0	0	0	0	0	0	0	0	0	0
428.997	65	Unknown	5				2	0	0	0	0	0	0	0	0	2	0	0	0
432.911	50.2	Unknown	5				45	0	45	0	0	0	0	0	0	0	0	0	0
433.896	48.4	Unknown	5				12	12	0	0	0	0	0	0	0	0	0	0	0
437.887	61	Unknown	5				5	5	0	0	0	0	0	0	0	0	0	0	0
440.897	61.5	Dichlorvos	4	HMDB33956	C4H7Cl2O4P	2M+H	369	0	250	0	26	0	0	0	83	0	10	0	0
443.924	45.7	Unknown	5				4	4	0	0	0	0	0	0	0	0	0	0	0
444.184	186.9	Chitobiose, Ecabet, 3-Methyl-3-butenyl apiosyl-(1-6)-glucoside, Prenyl apiosyl-(1-6)-glucoside, 6-(2-Carboxyethyl)-7-hydroxy-22-dimethyl-4-chromanone glucoside, Pyriminobac-methyl, Benzyl beta-primeveroside, Prenyl arabinosyl-(1-6)-glucoside, Benzyl O-arabinofuranosyl-(1-6)-glucoside, 3-p-Hydroxypaclitaxel, 6a-Hydrox-ypaclitaxel	4	HMDB03556, HMDB15613, HMDB31954, HMDB31956, HMDB34032, HMDB40546, HMDB41190, HMDB41360, HMDB41514, HMDB60753, HMDB60794	C15H26N2O12	M+NH4, M+ACN+Na, M+ACN+Na, M+ACN+Na, M+NH4, M+2ACN+H, M+ACN+H, M+ACN+Na, M+ACN+H, M+H+NH4, M+H+NH4	9	0	0	0	0	0	0	0	0	0	9	0	0
446.12	21.8	Guanosine monophosphate, 8-Oxo-dGMP, Peonidin-3-glucoside, Margrapine A, Isopeonidin 3-galactoside, Isopeonidin 3-glucoside, Cyclic pyranopterin monophosphate	4	HMDB01397, HMDB11670, HMDB13689, HMDB31254, HMDB41751, HMDB41752, HMDB59639	C10H14N5O8P	M+2ACN+H, M+2ACN+H, M+H-H2O, M+2Na-H, M+H-H2O, M+H-H2O, M+2ACN+H	25	0	0	0	0	0	15	0	0	0	10	0	0
446.644	59.6	Unknown	5				376	0	322	0	7	0	5	1	40	0	1	0	0
447.06	110.1	4-Phosphopantothenoylcysteine	4	HMDB01117	C12H23N2O9PS	M+2Na-H	1	0	0	0	0	0	0	0	1	0	0	0	0
448.867	36.1	PE(24:0P-18:1(11Z)), PE(24:0P-18:1(9Z)), PE(24:1(15Z)P-18:0), PE(P-18:024:1(15Z)), PE(P-18:1(11Z)24:0), PE(P-18:1(9Z)24:0)	4	HMDB09743, HMDB09744, HMDB09775, HMDB11396, HMDB11428, HMDB11461	C47H92NO7P	M+2ACN+2H, M+2ACN+2H, M+2ACN+2H, M+2ACN+2H, M+2ACN+2H, M+2ACN+2H	1	1	0	0	0	0	0	0	0	0	0	0	0
448.884	60.1	TG(16:016:020:4(5Z8Z11Z14Z))iso3, TG(16:018:2(9Z12Z)18:2(9Z12Z))iso3, TG(16:018:2(9Z12Z)20:4(5Z8Z11Z14Z))iso6, TG(16:1(9Z)18:1(9Z)18:2(9Z12Z))iso6, TG(16:1(9Z)18:1(9Z)20:4(5Z8Z11Z14Z))iso6, TG(18:2(9Z12Z)18:2(9Z12Z)18:2(9Z12Z)), TG(16:016:022:6(4Z7Z10Z13Z16Z19Z))iso3, TG(18:1(11Z)16:018:3(9Z12Z15Z))iso6, TG(18:1(11Z)16:1(9Z)18:2(9Z12Z))iso6, TG(18:1(9Z)16:018:3(9Z12Z15Z))iso6, TG(18:1(9Z)16:020:5…	4	HMDB05363, HMDB05390, HMDB05391, HMDB05440, HMDB05441, HMDB05474, HMDB10418, HMDB10440, HMDB10444, HMDB10451, HMDB10453, HMDB10481, HMDB10482, HMDB10501, HMDB31117, HMDB31118, HMDB42142, HMDB42170, HMDB42176, HMDB42179, HMDB42205, HMDB42343, HMDB42349, HMDB42353, HMDB42358, HMDB42373, HMDB42379, HMDB42383, HMDB42388, HMDB42407, HMDB42414, HMDB42417, HMDB42430, HMDB42431, HMDB42433, HMDB42439, HMD…	C55H98O6	M+ACN+2H, M+ACN+2H, M+H+NH4, M+ACN+2H, M+H+NH4, M+H+NH4, M+H+NH4, M+ACN+2H, M+ACN+2H, M+ACN+2H, M+H+NH4, M+H+NH4, M+H+NH4, M+H+NH4, M+ACN+2H, M+ACN+2H, M+ACN+2H, M+ACN+2H, M+ACN+2H, M+H+NH4, M+ACN+2H, M+ACN+2H, M+ACN+2H, M+H+NH4, M+H+NH4, M+ACN+2H, M+ACN+2H, M+H+NH4, M+H+NH4, M+ACN+2H, M+ACN+2H, M+H+NH4, M+ACN+2H, M+ACN+2H, M+H+NH4, M+H+NH4, M+ACN+2H, M+ACN+2H, M+ACN+2H, M+ACN+2H, M+ACN+2H, M+ACN…	1493	0	362	3	152	0	307	8	565	0	93	3	0
451.165	34.3	Flurazepam, Carvedilol, triazolopyridinone epoxide, 4-hydroxytrazodone	4	HMDB14828, HMDB15267, HMDB61059, HMDB61060	C21H23ClFN3O	M+ACN+Na, M+2Na-H, M+ACN+Na, M+ACN+Na	1	0	0	0	0	0	0	0	0	0	1	0	0
454.63	285.4	Unknown	5				3	0	0	0	0	0	3	0	0	0	0	0	0
454.875	47.1	Unknown	5				7	0	0	0	0	0	0	0	0	0	7	0	0
456.746	55.1	Unknown	5				1	1	0	0	0	0	0	0	0	0	0	0	0
460.768	49.4	Asparagoside D, Yuccoside C, Asparasaponin II, Tuberoside E, Hebevinoside VIII, Hebevinoside XIV, Tuberoside A (Allium tuberosum), Schidigerasaponin D3, Trigoneoside XIIb, Tuberoside K, Trigofoenoside A, Torvoside F	4	HMDB31836, HMDB33849, HMDB34063, HMDB34305, HMDB34598, HMDB34604, HMDB35481, HMDB36247, HMDB36280, HMDB39395, HMDB39483, HMDB41531	C45H74O18	M+H+NH4, M+H+NH4, M+H+NH4, M+H+NH4, M+ACN+2H, M+ACN+2H, M+H+NH4, M+H+NH4, M+H+NH4, M+H+NH4, M+H+NH4, M+H+NH4	2	0	0	0	0	0	2	0	0	0	0	0	0
461.776	60.6	Alliosterol 1-(4-galactosylrhamnoside) 16-galactoside, Torvoside A, Torvoside B	4	HMDB38346, HMDB41528, HMDB41529	C45H76O18	M+H+NH4, M+H+NH4, M+H+NH4	4	4	0	0	0	0	0	0	0	0	0	0	0
462.74	49.1	Unknown	5				6	1	0	5	0	0	0	0	0	0	0	0	0
462.762	52.6	Trigoneoside XIb	4	HMDB36485	C44H74O19	M+H+NH4	7	7	0	0	0	0	0	0	0	0	0	0	0
463.773	60.6	Azaspiracid 4, Azaspiracid 5	4	HMDB38232, HMDB38233	C46H69NO13	M+2ACN+2H, M+2ACN+2H	2	2	0	0	0	0	0	0	0	0	0	0	0
464.757	55.7	Unknown	5				2	2	0	0	0	0	0	0	0	0	0	0	0
464.864	49.9	Unknown	5				986	15	49	3	182	0	246	3	333	0	154	1	0
466.176	33.7	Eprosartan	4	HMDB15014	C23H24N2O4S	M+ACN+H	50	0	0	0	0	0	50	0	0	0	0	0	0
466.885	18.7	TG(14:018:2(9Z12Z)22:5(4Z7Z10Z13Z16Z)), TG(14:018:2(9Z12Z)22:5(7Z10Z13Z16Z19Z)), TG(14:020:2n622:5(4Z7Z10Z13Z16Z)), TG(14:020:2n622:5(7Z10Z13Z16Z19Z)), TG(14:022:5(4Z7Z10Z13Z16Z)18:2(9Z12Z)), TG(14:022:5(4Z7Z10Z13Z16Z)20:2n6), TG(14:022:5(7Z10Z13Z16Z19Z)18:2(9Z12Z)), TG(14:022:5(7Z10Z13Z16Z19Z)20:2n6), TG(15:018:1(11Z)22:6(4Z7Z10Z13Z16Z19Z)), TG(15:018:1(9Z)22:6(4Z7Z10Z13Z16Z19Z)), TG(15:020:3(5Z…	4	HMDB42533, HMDB42538, HMDB42593, HMDB42598, HMDB42736, HMDB42738, HMDB42886, HMDB42888, HMDB43248, HMDB43277, HMDB43326, HMDB43332, HMDB43335, HMDB43444, HMDB43500, HMDB43506, HMDB43509, HMDB43522, HMDB43528, HMDB43532, HMDB43537, HMDB43584, HMDB43591, HMDB43594, HMDB43616, HMDB43622, HMDB43647, HMDB43696, HMDB43702, HMDB43706, HMDB43711, HMDB43734, HMDB43761, HMDB43767, HMDB43780, HMDB43781, HMD…	C58H98O6	M+ACN+2H, M+ACN+2H, M+ACN+2H, M+ACN+2H, M+ACN+2H, M+ACN+2H, M+ACN+2H, M+ACN+2H, M+ACN+2H, M+ACN+2H, M+ACN+2H, M+ACN+2H, M+H+NH4, M+ACN+2H, M+ACN+2H, M+ACN+2H, M+H+NH4, M+ACN+2H, M+ACN+2H, M+H+NH4, M+H+NH4, M+ACN+2H, M+ACN+2H, M+H+NH4, M+H+NH4, M+H+NH4, M+ACN+2H, M+ACN+2H, M+ACN+2H, M+H+NH4, M+H+NH4, M+H+NH4, M+H+NH4, M+H+NH4, M+ACN+2H, M+ACN+2H, M+H+NH4, M+H+NH4, M+ACN+2H, M+ACN+2H, M+ACN+2H, M+A…	5	0	0	0	0	0	1	0	4	0	0	0	0
467.137	93.4	Neosilyhermin A, Silyhermin, Silandrin	4	HMDB30106, HMDB33324, HMDB33325	C25H22O9	M+H, M+H, M+H	141	8	9	0	0	0	0	0	124	0	0	0	0
471.804	60.6	Unknown	5				3	3	0	0	0	0	0	0	0	0	0	0	0
478.928	48.9	Unknown	5				4	4	0	0	0	0	0	0	0	0	0	0	0
480.751	51.6	28-Galloylglucosylpomolate 3-arabinoside	4	HMDB38315	C48H70O17	M+ACN+2H	58	0	0	0	0	0	49	0	9	0	0	0	0
486.842	47	Unknown	5				20	0	0	0	0	0	0	0	0	0	20	0	0
488.963	50.9	Xanthosine 5-triphosphate, TG(15:020:024:1(15Z)), TG(15:022:022:1(13Z)), TG(15:024:020:1(11Z)), TG(15:020:1(11Z)24:0), TG(15:022:1(13Z)22:0), TG(15:024:1(15Z)20:0), TG(20:015:024:1(15Z)), TG(22:015:022:1(13Z)), TG(24:015:020:1(11Z)), 6-Mercaptopurine ribonucleoside 5-diphosphate	4	HMDB00293, HMDB43089, HMDB43117, HMDB43144, HMDB43284, HMDB43341, HMDB43369, HMDB45513, HMDB46289, HMDB47034, HMDB60660	C10H15N4O15P3	M+H-2H2O, M+H+NH4, M+H+NH4, M+H+NH4, M+H+NH4, M+H+NH4, M+H+NH4, M+H+NH4, M+H+NH4, M+H+NH4, M+2Na-H	530	2	1	0	0	0	199	0	118	0	210	0	0
496.858	62	Unknown	5				1	0	1	0	0	0	0	0	0	0	0	0	0
500.853	61.4	Unknown	5				2	2	0	0	0	0	0	0	0	0	0	0	0
504.763	48.7	Unknown	5				37	0	0	0	0	0	0	0	0	0	37	0	0
507.719	54.5	Unknown	5				2	2	0	0	0	0	0	0	0	0	0	0	0
515.879	50.3	Unknown	5				4	0	0	0	0	4	0	0	0	0	0	0	0
521.732	60.4	Unknown	5				3	3	0	0	0	0	0	0	0	0	0	0	0
521.907	49	Unknown	5				157	0	0	0	0	0	56	0	62	0	39	0	0
523.729	60.9	Unknown	5				2	2	0	0	0	0	0	0	0	0	0	0	0
525.922	60.4	Unknown	5				136	0	0	0	42	0	11	83	0	0	0	0	0
528.191	164.7	Daunorubicin	4	HMDB14832	C27H29NO10	M+H	1	1	0	0	0	0	0	0	0	0	0	0	0
528.789	49.3	Unknown	5				23	0	23	0	0	0	0	0	0	0	0	0	0
529.412	25	Unknown	5				13	0	0	0	0	0	0	0	0	13	0	0	0
531.856	47.6	Unknown	5				285	0	87	0	0	0	2	46	146	0	4	0	0
533.831	47.6	Unknown	5				3	3	0	0	0	0	0	0	0	0	0	0	0
536.889	50.9	Unknown	5				6	0	0	0	0	0	0	0	0	0	6	0	0
544.932	24.8	Unknown	5				1	0	0	0	0	0	0	0	0	1	0	0	0
545.311	23.7	Neryl rhamnosyl-glucoside, Frangulanine, xi-Linalool 3-rhamnosyl-(1-6)-glucoside, Adouetine X, Metabolite M6	4	HMDB29349, HMDB30199, HMDB30422, HMDB34216, HMDB61034	C22H38O10	M+2ACN+H, M+2Na-H, M+2ACN+H, M+2Na-H, M+Na	2	0	0	0	0	0	0	0	0	2	0	0	0
545.895	44.4	Unknown	5				24	0	0	0	0	0	1	1	22	0	0	0	0
546.203	253.9	Deoxyinosine, Maltotriose, Raffinose, Levan, 3-Galactosyllactose, Dextrin, 17-beta-estradiol 3-sulfate-17-(beta-D-glucuronide), 1-Kestose, Melezitose, Gentiotriose, Neokestose, Galactotriose, 6-O-Glucosylmaltose, beta-D-Fructofuranosyl alpha-D-glucopyranosyl-(1-4)-D-glucopyranoside, Panose, Nebularine, 6-Kestose, Umbelliferose, Gentianose, Fagopyritol B2, beta-D-Galactopyranosyl-(1-2)-beta-D-gala…	4	HMDB00071, HMDB01262, HMDB03213, HMDB03539, HMDB06599, HMDB06857, HMDB10358, HMDB11729, HMDB11730, HMDB29910, HMDB29921, HMDB29922, HMDB29929, HMDB29930, HMDB29937, HMDB29956, HMDB33673, HMDB33748, HMDB34072, HMDB35322, HMDB38851, HMDB38852, HMDB38853, HMDB39703, HMDB39704, HMDB39706, HMDB39707, HMDB39708, HMDB40181, HMDB40984, HMDB41948, HMDB60189, HMDB60468	C10H12N4O4	2M+ACN+H, M+ACN+H, M+ACN+H, M+ACN+H, M+ACN+H, M+ACN+H, M+NH4, M+ACN+H, M+ACN+H, M+ACN+H, M+ACN+H, M+ACN+H, M+ACN+H, M+ACN+H, M+ACN+H, 2M+ACN+H, M+ACN+H, M+ACN+H, M+ACN+H, M+ACN+H, M+ACN+H, M+ACN+H, M+ACN+H, M+ACN+H, M+ACN+H, M+ACN+H, M+ACN+H, M+ACN+H, M+ACN+H, M+ACN+H, M+ACN+H, M+H+NH4, M+ACN+H	20	0	20	0	0	0	0	0	0	0	0	0	0
546.203	154.8	Lacto-N-triaose, Lacto-N-triose I, N-Acetylgalactosaminyl lactose	3	HMDB06592, HMDB39750, HMDB41622	C20H35NO16	M+H, M+H, M+H	5	4	1	0	0	0	0	0	0	0	0	0	0
547.206	154.6	Lacto-N-triaose, Lacto-N-triose I, N-Acetylgalactosaminyl lactose	3	HMDB06592, HMDB39750, HMDB41622	C20H35NO16	M+H_[+1], M+H_[+1], M+H_[+1]	23	0	21	0	0	0	0	0	2	0	0	0	0
547.832	49.9	Unknown	5				61	0	0	0	61	0	0	0	0	0	0	0	0
562.97	215.1	Unknown	5				2	2	0	0	0	0	0	0	0	0	0	0	0
563.23	151.9	Geranylfarnesyl diphosphate, N-Desmethylpromazine, Hypoglycin B, Dehydrodolichol diphosphate	4	HMDB12231, HMDB13939, HMDB29428, HMDB60469	C25H44O7P2	M+2Na-H, 2M+Na, 2M+Na, M+2Na-H	3	3	0	0	0	0	0	0	0	0	0	0	0
564.432	25.2	Unknown	5				10	0	0	0	0	0	0	0	0	10	0	0	0
564.848	62.5	Unknown	5				1	0	0	0	0	0	1	0	0	0	0	0	0
565.803	46.9	Capsicoside C	4	HMDB40665	C52H88O25	M+H+NH4	6	0	0	0	6	0	0	0	0	0	0	0	0
568.272	80.5	Tigecycline, (3S7E9R)-47-Megastigmadiene-39-diol 9-apiosyl-(1-6)-glucoside, Blumenol C O-apiosyl-(1-6)-glucoside, Neocasomorphin (1-5), desethylzaleplon	4	HMDB14700, HMDB29766, HMDB31936, HMDB60144, HMDB61055	C29H39N5O8	M+H-H2O, M+ACN+Na, M+ACN+Na, M+H-2H2O, 2M+ACN+H	3	3	0	0	0	0	0	0	0	0	0	0	0
571.919	50.6	Unknown	5				43	0	0	0	0	0	0	0	0	0	43	0	0
579.445	25.9	2-Hexaprenyl-3-methyl-5-hydroxy-6-methoxy-14-benzoquinol	4	HMDB12146	C38H58O4	M+H	14	0	0	0	0	0	0	0	0	0	0	14	0
580.777	50.2	Achyranthoside D	4	HMDB31023	C53H82O25	M+ACN+2H	4	0	0	0	0	0	0	0	0	0	4	0	0
581.688	60.2	Unknown	5				1	1	0	0	0	0	0	0	0	0	0	0	0
581.778	46.3	Unknown	5				5	0	0	0	0	0	0	4	1	0	0	0	0
584.861	50.2	Unknown	5				11	0	0	0	0	0	0	0	0	0	11	0	0
592.673	52.2	Unknown	5				2	2	0	0	0	0	0	0	0	0	0	0	0
597.754	48.7	Unknown	5				9	0	9	0	0	0	0	0	0	0	0	0	0
600.835	49.8	Unknown	5				55	6	0	0	0	0	45	0	3	0	1	0	0
612.776	61.7	Di-2-propenyl heptasulfide	4	HMDB39458	C6H10S7	2M+H	1	1	0	0	0	0	0	0	0	0	0	0	0
626.808	62.3	Unknown	5				1	0	0	0	0	0	0	0	0	0	1	0	0
639.425	23.3	Squamocin B, Mosin C, Squamolinone, Tsugarioside B, Squamone, 6-Hydroxydesacetyluvaricin (incorr), Muricin F, Muricin G, Parviflorin, Reticulacinone, Atemoyacin B, cis-Annonacin-10-one	4	HMDB31393, HMDB31398, HMDB35236, HMDB35509, HMDB35939, HMDB36282, HMDB36972, HMDB36973, HMDB40708, HMDB41213, HMDB41424, HMDB41524	C35H62O7	M+2Na-H, M+2Na-H, M+2Na-H, M+Na, M+2Na-H, M+2Na-H, M+2Na-H, M+2Na-H, M+2Na-H, M+2Na-H, M+2Na-H, M+2Na-H	2	0	0	0	0	0	0	0	0	0	0	2	0
650.755	48.8	Unknown	5				6	0	0	0	0	0	0	0	0	0	6	0	0
655.421	23.7	Annonisin, Trilobalicin, Annoglaxin, Momordicoside G, 28-Glucopyranosyl-3-methyloleanolic acid	4	HMDB31394, HMDB31926, HMDB33603, HMDB35821, HMDB36966	C35H62O8	M+2Na-H, M+2Na-H, M+2Na-H, M+Na, M+Na	6	0	0	0	0	0	0	0	0	0	6	0	0
656.889	65.3	Unknown	5				12	0	0	0	0	0	10	0	2	0	0	0	0
661.538	35.3	Glucosylceramide (d18:112:0), TG(12:012:012:0), Galactosylceramide (d18:112:0)	4	HMDB04969, HMDB11188, HMDB12320	C36H69NO8	M+NH4, M+Na, M+NH4	2	0	0	0	0	0	0	0	0	0	2	0	0
670.734	61.4	Unknown	5				5	5	0	0	0	0	0	0	0	0	0	0	0
673.716	60.4	Unknown	5				122	0	0	0	0	0	0	122	0	0	0	0	0
684.256	240.9	Glycogen, Maltotetraose, Stachyose, Mannan, Fagopyritol B3, Bifurcose, Neobifurcose, Sesamose, 3-beta-Glucosylcellotriose, 3-beta-Cellobiosylcellobiose, Nystose, Tetramethylquercetin 3-rutinoside, Fagopyritol A3	4	HMDB00757, HMDB01296, HMDB03553, HMDB29931, HMDB35323, HMDB38490, HMDB38870, HMDB38871, HMDB39173, HMDB39174, HMDB39176, HMDB39337, HMDB40182	C24H42O21	M+NH4, M+NH4, M+NH4, M+NH4, M+NH4, M+NH4, M+NH4, M+NH4, M+NH4, M+NH4, M+NH4, M+NH4, M+NH4	42	41	1	0	0	0	0	0	0	0	0	0	0
704.926	23	Unknown	5				2	2	0	0	0	0	0	0	0	0	0	0	0
708.727	48	Unknown	5				2	0	0	0	0	0	0	0	0	0	0	2	0
722.581	25.2	Plastoquinone 8	4	HMDB30129	C48H72O2	M+ACN+H	7	0	0	0	0	0	0	0	0	7	0	0	0
723.082	25.1	Unknown	5				8	0	0	0	0	0	0	0	0	8	0	0	0
726.651	51.5	Unknown	5				16	0	0	0	0	0	16	0	0	0	0	0	0
734.568	33.4	PC(16:016:0), PC(14:018:0), PC(18:014:0), PE(15:020:0), PE(20:015:0)	4	HMDB00564, HMDB07871, HMDB08031, HMDB08899, HMDB09219	C40H80NO8P	M+H, M+H, M+H, M+H, M+H	43	0	0	0	1	0	0	0	42	0	0	0	0
734.812	50.3	Unknown	5				5	0	5	0	0	0	0	0	0	0	0	0	0
736.592	27.3	Anandamide, DG(20:1(11Z)22:6(4Z7Z10Z13Z16Z19Z)0:0), DG(20:2(11Z14Z)22:5(4Z7Z10Z13Z16Z)0:0), DG(20:2(11Z14Z)22:5(7Z10Z13Z16Z19Z)0:0), DG(20:3(5Z8Z11Z)22:4(7Z10Z13Z16Z)0:0), DG(20:3(8Z11Z14Z)22:4(7Z10Z13Z16Z)0:0), DG(20:5(5Z8Z11Z14Z17Z)22:2(13Z16Z)0:0), DG(22:2(13Z16Z)20:5(5Z8Z11Z14Z17Z)0:0), DG(22:4(7Z10Z13Z16Z)20:3(5Z8Z11Z)0:0), DG(22:4(7Z10Z13Z16Z)20:3(8Z11Z14Z)0:0), DG(22:4(7Z10Z13Z16Z)22:5(4Z7…	4	HMDB04080, HMDB07411, HMDB07438, HMDB07439, HMDB07466, HMDB07495, HMDB07581, HMDB07665, HMDB07690, HMDB07691, HMDB07699, HMDB07700, HMDB07718, HMDB07727, HMDB07747, HMDB07756, HMDB07775, HMDB13655, HMDB56233, HMDB56243, HMDB56324, HMDB56348, HMDB56352, HMDB56357	C22H37NO2	2M+ACN+H, M+ACN+H, M+ACN+H, M+ACN+H, M+ACN+H, M+ACN+H, M+ACN+H, M+ACN+H, M+ACN+H, M+ACN+H, M+NH4, M+NH4, M+ACN+H, M+NH4, M+ACN+H, M+NH4, M+ACN+H, 2M+ACN+H, M+ACN+H, M+ACN+H, M+ACN+H, M+ACN+H, M+NH4, M+NH4	2	0	0	0	0	0	0	0	0	2	0	0	0
736.794	48.6	Unknown	5				1	0	0	0	0	0	1	0	0	0	0	0	0
745.084	25.1	NADP	4	HMDB00217	C21H29N7O17P3	M+H	7	0	0	0	0	0	0	0	0	7	0	0	0
746.085	25.1	Unknown	5				9	0	0	0	0	0	0	0	0	9	0	0	0
749.53	26.7	PG(16:018:1(11Z)), PG(16:018:1(9Z)), PG(16:1(9Z)18:0), PG(18:016:1(9Z)), PG(18:1(11Z)16:0), PG(18:1(9Z)16:0)	4	HMDB10573, HMDB10574, HMDB10587, HMDB10601, HMDB10615, HMDB10630	C40H77O10P	M+H, M+H, M+H, M+H, M+H, M+H	8	0	0	0	0	0	0	0	0	8	0	0	0
749.701	46.4	Arachisprenol 11	4	HMDB31939	C55H90O	M+H-H2O	1	0	0	0	0	0	1	0	0	0	0	0	0
754.762	48.7	erythro-68-Tricosanediol	4	HMDB41070	C23H48O2	2M+ACN+H	19	2	2	0	0	0	0	0	0	0	0	15	0
779.446	55.7	Doxapram	4	HMDB14701	C24H30N2O2	2M+Na	91	0	7	0	1	0	0	0	0	0	83	0	0
806.568	27	PC(14:1(9Z)22:2(13Z16Z)), PC(16:020:3(5Z8Z11Z)), PC(16:020:3(8Z11Z14Z)), PC(16:1(9Z)20:2(11Z14Z)), PC(18:018:3(6Z9Z12Z)), PC(18:018:3(9Z12Z15Z)), PC(18:1(11Z)18:2(9Z12Z)), PC(18:1(9Z)18:2(9Z12Z)), PC(18:2(9Z12Z)18:1(11Z)), PC(18:2(9Z12Z)18:1(9Z)), PC(18:3(6Z9Z12Z)18:0), PC(18:3(9Z12Z15Z)18:0), PC(20:2(11Z14Z)16:1(9Z)), PC(20:3(5Z8Z11Z)16:0), PC(20:3(8Z11Z14Z)16:0), PC(22:2(13Z16Z)14:1(9Z))	3	HMDB07921, HMDB07980, HMDB07981, HMDB08012, HMDB08040, HMDB08041, HMDB08072, HMDB08105, HMDB08136, HMDB08137, HMDB08168, HMDB08201, HMDB08332, HMDB08364, HMDB08397, HMDB08591	C44H82NO8P	M+Na, M+Na, M+Na, M+Na, M+Na, M+Na, M+Na, M+Na, M+Na, M+Na, M+Na, M+Na, M+Na, M+Na, M+Na, M+Na	11	0	0	0	0	0	0	0	0	10	1	0	0
806.857	62.3	Unknown	5				1	0	0	0	0	0	0	1	0	0	0	0	0
810.748	52.1	Cerebronic acid, TG(14:015:018:0), TG(14:018:015:0), TG(15:014:018:0), TG(15:016:016:0), TG(16:015:016:0)	4	HMDB39540, HMDB42094, HMDB42152, HMDB42962, HMDB43019, HMDB43857	C24H48O3	2M+ACN+H, M+NH4, M+NH4, M+NH4, M+NH4, M+NH4	39	0	0	0	0	0	0	0	0	0	39	0	0
818.678	48.2	PC(24:1(15Z)P-18:1(11Z)), PC(24:1(15Z)P-18:1(9Z)), PC(P-18:1(11Z)24:1(15Z)), PC(P-18:1(9Z)24:1(15Z)), PC(o-24:018:3(6Z9Z12Z)), PC(o-24:018:3(9Z12Z15Z)), SM(d18:022:1(13Z)(OH))	4	HMDB08819, HMDB08820, HMDB11297, HMDB11330, HMDB13458, HMDB13459, HMDB13466	C50H96NO7P	M+H-2H2O, M+H-2H2O, M+H-2H2O, M+H-2H2O, M+H-2H2O, M+H-2H2O, M+NH4	1	0	0	0	0	0	1	0	0	0	0	0	0
820.775	55.8	TG(14:015:0o-18:0), TG(14:0o-18:015:0), TG(15:014:0o-18:0)	4	HMDB42120, HMDB42932, HMDB42988	C50H98O5	M+ACN+H, M+ACN+H, M+ACN+H	17	0	0	0	0	0	0	0	0	0	0	17	0
874.647	34	3-O-Sulfogalactosylceramide (d18:124:0), beta-Carotinal, Apo-8-lycopenal	4	HMDB00024, HMDB36886, HMDB39016	C48H93NO11S	M+H-H2O, 2M+ACN+H, 2M+ACN+H	1	1	0	0	0	0	0	0	0	0	0	0	0
988.401	55.6	Unknown	5				1504	3	392	8	175	6	262	106	492	0	31	29	0
1014.27	55.5	trans-2-Enoyl-OPC6-CoA, (3S)-3-Hydroxy-ciscis-palmito-710-dienoyl-CoA	4	HMDB11121, HMDB12473	C37H58N7O18P3S	M+H, M+H	1	0	0	0	0	0	0	0	0	0	1	0	0
The level of confidence in each metabolite annotation per Schymanski et. al. (2014)32: 1=lab confirmed structure by reference standards, 3=tentative candidate via a high confident computational match to human metabolome database, 4=unequivocal molecular formula via a medium confidence computational match, 5=exact mass of interest via a low confidence computational match; computational matches mad…
HMDB = Human metabolome database annotation
