# Supplementary material for: Multiomics Analysis of Structural Magnetic Resonance Imaging of the Brain and Cerebrospinal Fluid Metabolomics in Cognitively Normal and Impaired Adults
Source: Front Aging Neurosci. 2022 Jan 25;13:796067. doi: 10.3389/fnagi.2021.796067 (PMC8822333; doi:10.3389/fnagi.2021.796067)
Supplement: Supplementary file 4 [file Table_4.xlsx]

## Sheet: Parietal Cortex
Supplemental Table 4. Metabolic pathways associated with the parietal cortex
Metabolic Pathway	Metabolite hits	Metabolite pathway size	P-value
Arginine and Proline Metabolism	3	40	0.00294093
Valine, leucine and isoleucine degradation	2	20	0.0078985
Methionine and cysteine metabolism	3	62	0.0102512
Urea cycle/amino group metabolism	3	71	0.0147887
Histidine metabolism	2	35	0.0209226
Nitrogen metabolism	1	6	0.0250399
Vitamin B9 (folate) metabolism	1	10	0.0381481
Purine metabolism	2	56	0.04445
Putative anti-Inflammatory metabolites formation from EPA	1	14	0.053861
Glutamate metabolism	1	16	0.0605831
Glutathione Metabolism	1	17	0.0639442
Beta-Alanine metabolism	1	17	0.0639442
Selenoamino acid metabolism	1	17	0.0639442
Ascorbate (Vitamin C) and Aldarate Metabolism	1	18	0.0673053
Aspartate and asparagine metabolism	2	78	0.0776405
Vitamin B3 (nicotinate and nicotinamide) metabolism	1	23	0.0846988
Alanine and Aspartate Metabolism	1	23	0.0846988
Arachidonic acid metabolism	1	23	0.0846988
Butanoate metabolism	1	24	0.0874716
Leukotriene metabolism	1	24	0.0874716
Tryptophan metabolism	2	89	0.0911688
Aminosugars metabolism	1	28	0.0976389
Lysine metabolism	1	30	0.103353
Fatty acid activation	1	34	0.111167
Pyrimidine metabolism	1	51	0.13377
Glycine, serine, alanine and threonine metabolism	1	61	0.141837
Tyrosine metabolism	1	114	0.162843
Vitamin D3 (cholecalciferol) metabolism	0	10	0.165868
Hyaluronan Metabolism	0	4	0.165868
N-Glycan biosynthesis	0	8	0.165868
Glycolysis and Gluconeogenesis	0	29	0.165868
Glycosphingolipid biosynthesis - ganglioseries	0	12	0.165868
R Group Synthesis	0	0	0.165868
C5-Branched dibasic acid metabolism	0	2	0.165868
Pyruvate Metabolism	0	8	0.165868
Sialic acid metabolism	0	23	0.165868
Chondroitin sulfate degradation	0	11	0.165868
Di-unsaturated fatty acid beta-oxidation	0	7	0.165868
Linoleate metabolism	0	48	0.165868
Hexose phosphorylation	0	14	0.165868
Vitamin B2 (riboflavin) metabolism	0	4	0.165868
Squalene and cholesterol biosynthesis	0	15	0.165868
Galactose metabolism	0	24	0.165868
Keratan sulfate degradation	0	13	0.165868
Glycerolipid metabolism	0	0	0.165868
Carnitine shuttle	0	12	0.165868
3-oxo-10R-octadecatrienoate beta-oxidation	0	13	0.165868
Alkaloid biosynthesis II	0	7	0.165868
Vitamin B1 (thiamin) metabolism	0	10	0.165868
Glycosphingolipid biosynthesis - globoseries	0	7	0.165868
Vitamin B5 - CoA biosynthesis from pantothenate	0	9	0.165868
Glycosylphosphatidylinositol(GPI)-anchor biosynthesis	0	2	0.165868
Glycosphingolipid biosynthesis - lactoseries	0	1	0.165868
Bile acid biosynthesis	0	12	0.165868
Parathio degradation	0	4	0.165868
Propanoate metabolism	0	8	0.165868
Blood Group Biosynthesis	0	1	0.165868
Electron transport chain	0	0	0.165868
Vitamin H (biotin) metabolism	0	2	0.165868
Biopterin metabolism	0	13	0.165868
Vitamin E metabolism	0	14	0.165868
Androgen and estrogen biosynthesis and metabolism	0	36	0.165868
Caffeine metabolism	0	16	0.165868
Lipoate metabolism	0	2	0.165868
Heparan sulfate biosynthesis	0	0	0.165868
Drug metabolism - cytochrome P450	0	30	0.165868
Glyoxylate and Dicarboxylate Metabolism	0	9	0.165868
De novo fatty acid biosynthesis	0	23	0.165868
Vitamin A (retinol) metabolism	0	16	0.165868
Fatty Acid Metabolism	0	22	0.165868
Glycosaminoglycan degradation	0	0	0.165868
Fatty acid oxidation	0	1	0.165868
Fructose and mannose metabolism	0	17	0.165868
ROS Detoxification	0	0	0.165868
Xenobiotics metabolism	0	59	0.165868
Saturated fatty acids beta-oxidation	0	5	0.165868
CoA Catabolism	0	5	0.165868
Omega-3 fatty acid metabolism	0	13	0.165868
Mono-unsaturated fatty acid beta-oxidation	0	3	0.165868
Glycosphingolipid biosynthesis - neolactoseries	0	1	0.165868
Geraniol degradation	0	0	0.165868
D4&E4-neuroprostanes formation	0	6	0.165868
Vitamin D	0	2	0.165868
Dynorphin metabolism	0	0	0.165868
Heparan sulfate degradation	0	11	0.165868
Fatty acid oxidation, peroxisome	0	1	0.165868
Polyunsaturated fatty acid biosynthesis	0	1	0.165868
Keratan sulfate biosynthesis	0	3	0.165868
TCA cycle	0	17	0.165868
3-Chloroacrylic acid degradation	0	4	0.165868
Sphingolipid metabolism	0	2	0.165868
O-Glycan biosynthesis	0	1	0.165868
Glycosphingolipid metabolism	0	29	0.165868
Limonene and pinene degradation	0	10	0.165868
Proteoglycan biosynthesis	0	2	0.165868
Vitamin K metabolism	0	0	0.165868
Glycerophospholipid metabolism	0	51	0.165868
Porphyrin metabolism	0	11	0.165868
Phosphatidylinositol phosphate metabolism	0	19	0.165868
Benzoate degradation via CoA ligation	0	1	0.165868
Prostaglandin formation from arachidonate	0	25	0.165868
Dimethyl-branched-chain fatty acid mitochondrial beta-oxidation	0	0	0.165868
Vitamin B6 (pyridoxine) metabolism	0	8	0.165868
Pentose and Glucuronate Interconversions	0	8	0.165868
Atrazine degradation	0	0	0.165868
N-Glycan Degradation	0	13	0.165868
Vitamin B12 (cyanocobalamin) metabolism	0	2	0.165868
Carbon fixation	0	10	0.165868
Nucleotide Sugar Metabolism	0	2	0.165868
Ubiquinone Biosynthesis	0	7	0.165868
1- and 2-Methylnaphthalene degradation	0	5	0.165868
Drug metabolism - other enzymes	0	16	0.165868
Prostaglandin formation from dihomo gama-linoleic acid	0	2	0.165868
C21-steroid hormone biosynthesis and metabolism	0	42	0.165868
Starch and Sucrose Metabolism	0	9	0.165868
Trihydroxycoprostanoyl-CoA beta-oxidation	0	0	0.165868
Omega-6 fatty acid metabolism	0	3	0.165868
Phytanic acid peroxisomal oxidation	0	5	0.165868
Pentose phosphate pathway	0	25	0.165868

## Sheet: Posterior Thalamus
Supplemental Table 5. Metabolic pathways associated with the posterior thalamus
Metabolic Pathway	Metabolite hits	Metabolite pathway size	P-value
Lysine metabolism	4	30	0.00025208
Urea cycle/amino group metabolism	5	71	0.00176456
Histidine metabolism	3	35	0.00899084
Vitamin B12 (cyanocobalamin) metabolism	1	2	0.0119318
Saturated fatty acids beta-oxidation	1	5	0.0306697
Glycine, serine, alanine and threonine metabolism	3	61	0.0361314
Ubiquinone Biosynthesis	1	7	0.044282
Vitamin B1 (thiamin) metabolism	1	10	0.06344
Limonene and pinene degradation	1	10	0.06344
Aspartate and asparagine metabolism	3	78	0.0672212
Hexose phosphorylation	1	14	0.0820939
Tryptophan metabolism	3	89	0.0828502
Glutamate metabolism	1	16	0.0899924
Fructose and mannose metabolism	1	17	0.0931014
Beta-Alanine metabolism	1	17	0.0931014
Ascorbate (Vitamin C) and Aldarate Metabolism	1	18	0.0963785
Phosphatidylinositol phosphate metabolism	1	19	0.100748
Valine, leucine and isoleucine degradation	1	20	0.10184
Fatty Acid Metabolism	1	22	0.106126
De novo fatty acid biosynthesis	1	23	0.108142
Vitamin B3 (nicotinate and nicotinamide) metabolism	1	23	0.108142
Galactose metabolism	1	24	0.109066
Butanoate metabolism	1	24	0.109066
Glycosphingolipid metabolism	1	29	0.118561
Drug metabolism - cytochrome P450	1	30	0.119486
Fatty acid activation	1	34	0.125032
Androgen and estrogen biosynthesis and metabolism	1	36	0.127048
Arginine and Proline Metabolism	1	40	0.131334
Glycerophospholipid metabolism	1	51	0.137467
Pyrimidine metabolism	1	51	0.137467
Purine metabolism	1	56	0.139064
Xenobiotics metabolism	1	59	0.14024
Methionine and cysteine metabolism	1	62	0.140324
Vitamin D3 (cholecalciferol) metabolism	0	10	0.142173
Hyaluronan Metabolism	0	4	0.142173
N-Glycan biosynthesis	0	8	0.142173
Glycolysis and Gluconeogenesis	0	29	0.142173
Glycosphingolipid biosynthesis - ganglioseries	0	12	0.142173
R Group Synthesis	0	0	0.142173
C5-Branched dibasic acid metabolism	0	2	0.142173
Pyruvate Metabolism	0	8	0.142173
Sialic acid metabolism	0	23	0.142173
Chondroitin sulfate degradation	0	11	0.142173
Di-unsaturated fatty acid beta-oxidation	0	7	0.142173
Putative anti-Inflammatory metabolites formation from EPA	0	14	0.142173
Linoleate metabolism	0	48	0.142173
Vitamin B2 (riboflavin) metabolism	0	4	0.142173
Squalene and cholesterol biosynthesis	0	15	0.142173
Keratan sulfate degradation	0	13	0.142173
Glycerolipid metabolism	0	0	0.142173
Carnitine shuttle	0	12	0.142173
3-oxo-10R-octadecatrienoate beta-oxidation	0	13	0.142173
Alkaloid biosynthesis II	0	7	0.142173
Glycosphingolipid biosynthesis - globoseries	0	7	0.142173
Vitamin B5 - CoA biosynthesis from pantothenate	0	9	0.142173
Glycosylphosphatidylinositol(GPI)-anchor biosynthesis	0	2	0.142173
Glycosphingolipid biosynthesis - lactoseries	0	1	0.142173
Bile acid biosynthesis	0	12	0.142173
Parathio degradation	0	4	0.142173
Propanoate metabolism	0	8	0.142173
Blood Group Biosynthesis	0	1	0.142173
Electron transport chain	0	0	0.142173
Vitamin H (biotin) metabolism	0	2	0.142173
Biopterin metabolism	0	13	0.142173
Vitamin E metabolism	0	14	0.142173
Caffeine metabolism	0	16	0.142173
Lipoate metabolism	0	2	0.142173
Heparan sulfate biosynthesis	0	0	0.142173
Vitamin B9 (folate) metabolism	0	10	0.142173
Glyoxylate and Dicarboxylate Metabolism	0	9	0.142173
Vitamin A (retinol) metabolism	0	16	0.142173
Glycosaminoglycan degradation	0	0	0.142173
Fatty acid oxidation	0	1	0.142173
ROS Detoxification	0	0	0.142173
CoA Catabolism	0	5	0.142173
Omega-3 fatty acid metabolism	0	13	0.142173
Mono-unsaturated fatty acid beta-oxidation	0	3	0.142173
Glycosphingolipid biosynthesis - neolactoseries	0	1	0.142173
Geraniol degradation	0	0	0.142173
D4&E4-neuroprostanes formation	0	6	0.142173
Vitamin D	0	2	0.142173
Dynorphin metabolism	0	0	0.142173
Heparan sulfate degradation	0	11	0.142173
Fatty acid oxidation, peroxisome	0	1	0.142173
Polyunsaturated fatty acid biosynthesis	0	1	0.142173
Alanine and Aspartate Metabolism	0	23	0.142173
Glutathione Metabolism	0	17	0.142173
Keratan sulfate biosynthesis	0	3	0.142173
TCA cycle	0	17	0.142173
3-Chloroacrylic acid degradation	0	4	0.142173
Arachidonic acid metabolism	0	23	0.142173
Sphingolipid metabolism	0	2	0.142173
O-Glycan biosynthesis	0	1	0.142173
Proteoglycan biosynthesis	0	2	0.142173
Vitamin K metabolism	0	0	0.142173
Porphyrin metabolism	0	11	0.142173
Benzoate degradation via CoA ligation	0	1	0.142173
Prostaglandin formation from arachidonate	0	25	0.142173
Dimethyl-branched-chain fatty acid mitochondrial beta-oxidation	0	0	0.142173
Vitamin B6 (pyridoxine) metabolism	0	8	0.142173
Pentose and Glucuronate Interconversions	0	8	0.142173
Atrazine degradation	0	0	0.142173
N-Glycan Degradation	0	13	0.142173
Leukotriene metabolism	0	24	0.142173
Carbon fixation	0	10	0.142173
Nucleotide Sugar Metabolism	0	2	0.142173
1- and 2-Methylnaphthalene degradation	0	5	0.142173
Nitrogen metabolism	0	6	0.142173
Drug metabolism - other enzymes	0	16	0.142173
Aminosugars metabolism	0	28	0.142173
Tyrosine metabolism	1	114	0.142173
Prostaglandin formation from dihomo gama-linoleic acid	0	2	0.142173
C21-steroid hormone biosynthesis and metabolism	0	42	0.142173
Starch and Sucrose Metabolism	0	9	0.142173
Trihydroxycoprostanoyl-CoA beta-oxidation	0	0	0.142173
Omega-6 fatty acid metabolism	0	3	0.142173
Phytanic acid peroxisomal oxidation	0	5	0.142173
Pentose phosphate pathway	0	25	0.142173
Selenoamino acid metabolism	0	17	0.142173

## Sheet: Hippocampus (right hemisphere)
Supplemental Table 6. Metabolic pathways associated with the right hemisphere of the hippocampus
Metabolic Pathway	Metabolite hits	Metabolite pathway size	P-value
Urea cycle/amino group metabolism	4	71	0.00294093
Lysine metabolism	2	30	0.0152928
Arginine and Proline Metabolism	2	40	0.0268045
Vitamin B1 (thiamin) metabolism	1	10	0.0422654
Caffeine metabolism	1	16	0.0616755
Ascorbate (Vitamin C) and Aldarate Metabolism	1	18	0.0668011
Drug metabolism - cytochrome P450	1	30	0.0850349
Histidine metabolism	1	35	0.0895723
Purine metabolism	1	56	0.102933
Glycine, serine, alanine and threonine metabolism	1	61	0.104865
Methionine and cysteine metabolism	1	62	0.105033
Aspartate and asparagine metabolism	1	78	0.10789
Tryptophan metabolism	1	89	0.108982
Vitamin D3 (cholecalciferol) metabolism	0	10	0.110495
Hyaluronan Metabolism	0	4	0.110495
N-Glycan biosynthesis	0	8	0.110495
Glycolysis and Gluconeogenesis	0	29	0.110495
Glycosphingolipid biosynthesis - ganglioseries	0	12	0.110495
R Group Synthesis	0	0	0.110495
C5-Branched dibasic acid metabolism	0	2	0.110495
Pyruvate Metabolism	0	8	0.110495
Sialic acid metabolism	0	23	0.110495
Chondroitin sulfate degradation	0	11	0.110495
Di-unsaturated fatty acid beta-oxidation	0	7	0.110495
Putative anti-Inflammatory metabolites formation from EPA	0	14	0.110495
Linoleate metabolism	0	48	0.110495
Hexose phosphorylation	0	14	0.110495
Vitamin B2 (riboflavin) metabolism	0	4	0.110495
Squalene and cholesterol biosynthesis	0	15	0.110495
Galactose metabolism	0	24	0.110495
Keratan sulfate degradation	0	13	0.110495
Glycerolipid metabolism	0	0	0.110495
Carnitine shuttle	0	12	0.110495
3-oxo-10R-octadecatrienoate beta-oxidation	0	13	0.110495
Alkaloid biosynthesis II	0	7	0.110495
Glycosphingolipid biosynthesis - globoseries	0	7	0.110495
Vitamin B5 - CoA biosynthesis from pantothenate	0	9	0.110495
Glycosylphosphatidylinositol(GPI)-anchor biosynthesis	0	2	0.110495
Glycosphingolipid biosynthesis - lactoseries	0	1	0.110495
Bile acid biosynthesis	0	12	0.110495
Parathio degradation	0	4	0.110495
Propanoate metabolism	0	8	0.110495
Blood Group Biosynthesis	0	1	0.110495
Electron transport chain	0	0	0.110495
Vitamin H (biotin) metabolism	0	2	0.110495
Biopterin metabolism	0	13	0.110495
Vitamin E metabolism	0	14	0.110495
Androgen and estrogen biosynthesis and metabolism	0	36	0.110495
Lipoate metabolism	0	2	0.110495
Heparan sulfate biosynthesis	0	0	0.110495
Vitamin B9 (folate) metabolism	0	10	0.110495
Glyoxylate and Dicarboxylate Metabolism	0	9	0.110495
De novo fatty acid biosynthesis	0	23	0.110495
Vitamin A (retinol) metabolism	0	16	0.110495
Valine, leucine and isoleucine degradation	0	20	0.110495
Fatty Acid Metabolism	0	22	0.110495
Glycosaminoglycan degradation	0	0	0.110495
Fatty acid oxidation	0	1	0.110495
Fructose and mannose metabolism	0	17	0.110495
ROS Detoxification	0	0	0.110495
Xenobiotics metabolism	0	59	0.110495
Saturated fatty acids beta-oxidation	0	5	0.110495
CoA Catabolism	0	5	0.110495
Omega-3 fatty acid metabolism	0	13	0.110495
Butanoate metabolism	0	24	0.110495
Mono-unsaturated fatty acid beta-oxidation	0	3	0.110495
Glycosphingolipid biosynthesis - neolactoseries	0	1	0.110495
Vitamin B3 (nicotinate and nicotinamide) metabolism	0	23	0.110495
Geraniol degradation	0	0	0.110495
D4&E4-neuroprostanes formation	0	6	0.110495
Vitamin D	0	2	0.110495
Dynorphin metabolism	0	0	0.110495
Heparan sulfate degradation	0	11	0.110495
Fatty acid oxidation, peroxisome	0	1	0.110495
Polyunsaturated fatty acid biosynthesis	0	1	0.110495
Alanine and Aspartate Metabolism	0	23	0.110495
Glutathione Metabolism	0	17	0.110495
Keratan sulfate biosynthesis	0	3	0.110495
TCA cycle	0	17	0.110495
3-Chloroacrylic acid degradation	0	4	0.110495
Arachidonic acid metabolism	0	23	0.110495
Sphingolipid metabolism	0	2	0.110495
O-Glycan biosynthesis	0	1	0.110495
Glycosphingolipid metabolism	0	29	0.110495
Limonene and pinene degradation	0	10	0.110495
Proteoglycan biosynthesis	0	2	0.110495
Vitamin K metabolism	0	0	0.110495
Glycerophospholipid metabolism	0	51	0.110495
Glutamate metabolism	0	16	0.110495
Porphyrin metabolism	0	11	0.110495
Phosphatidylinositol phosphate metabolism	0	19	0.110495
Benzoate degradation via CoA ligation	0	1	0.110495
Prostaglandin formation from arachidonate	0	25	0.110495
Dimethyl-branched-chain fatty acid mitochondrial beta-oxidation	0	0	0.110495
Vitamin B6 (pyridoxine) metabolism	0	8	0.110495
Pentose and Glucuronate Interconversions	0	8	0.110495
Atrazine degradation	0	0	0.110495
N-Glycan Degradation	0	13	0.110495
Leukotriene metabolism	0	24	0.110495
Vitamin B12 (cyanocobalamin) metabolism	0	2	0.110495
Fatty acid activation	0	34	0.110495
Carbon fixation	0	10	0.110495
Nucleotide Sugar Metabolism	0	2	0.110495
Ubiquinone Biosynthesis	0	7	0.110495
1- and 2-Methylnaphthalene degradation	0	5	0.110495
Pyrimidine metabolism	0	51	0.110495
Nitrogen metabolism	0	6	0.110495
Drug metabolism - other enzymes	0	16	0.110495
Aminosugars metabolism	0	28	0.110495
Tyrosine metabolism	0	114	0.110495
Beta-Alanine metabolism	0	17	0.110495
Prostaglandin formation from dihomo gama-linoleic acid	0	2	0.110495
C21-steroid hormone biosynthesis and metabolism	0	42	0.110495
Starch and Sucrose Metabolism	0	9	0.110495
Trihydroxycoprostanoyl-CoA beta-oxidation	0	0	0.110495
Omega-6 fatty acid metabolism	0	3	0.110495
Phytanic acid peroxisomal oxidation	0	5	0.110495
Pentose phosphate pathway	0	25	0.110495
Selenoamino acid metabolism	0	17	0.110495

## Sheet: Hippocampus (left, cluster A)
Supplemental Table 7. Metabolic pathways associated with the left hemisphere of the hippocampus (cluster A)
Metabolic Pathway	Metabolite hits	Metabolite pathway size	P-value
Urea cycle/amino group metabolism	6	71	0.000504159
Glycine, serine, alanine and threonine metabolism	4	61	0.00403327
Histidine metabolism	3	35	0.00512562
Arginine and Proline Metabolism	3	40	0.00680615
Glutamate metabolism	2	16	0.00705823
Beta-Alanine metabolism	2	17	0.00831863
Valine, leucine and isoleucine degradation	2	20	0.0119318
Butanoate metabolism	2	24	0.0168053
Lysine metabolism	2	30	0.0257121
Nitrogen metabolism	1	6	0.0287371
Aspartate and asparagine metabolism	3	78	0.0417612
Vitamin B9 (folate) metabolism	1	10	0.0533569
Limonene and pinene degradation	1	10	0.0533569
Tryptophan metabolism	3	89	0.0612554
Pyrimidine metabolism	2	51	0.072683
Putative anti-Inflammatory metabolites formation from EPA	1	14	0.0741114
Purine metabolism	2	56	0.0834384
Glutathione Metabolism	1	17	0.0873036
Selenoamino acid metabolism	1	17	0.0873036
Ascorbate (Vitamin C) and Aldarate Metabolism	1	18	0.0912528
Methionine and cysteine metabolism	2	62	0.0937736
Vitamin B3 (nicotinate and nicotinamide) metabolism	1	23	0.106462
Alanine and Aspartate Metabolism	1	23	0.106462
Arachidonic acid metabolism	1	23	0.106462
Leukotriene metabolism	1	24	0.108394
Aminosugars metabolism	1	28	0.116797
Drug metabolism - cytochrome P450	1	30	0.12125
Tyrosine metabolism	1	114	0.156457
Vitamin D3 (cholecalciferol) metabolism	0	10	0.157046
Hyaluronan Metabolism	0	4	0.157046
N-Glycan biosynthesis	0	8	0.157046
Glycolysis and Gluconeogenesis	0	29	0.157046
Glycosphingolipid biosynthesis - ganglioseries	0	12	0.157046
R Group Synthesis	0	0	0.157046
C5-Branched dibasic acid metabolism	0	2	0.157046
Pyruvate Metabolism	0	8	0.157046
Sialic acid metabolism	0	23	0.157046
Chondroitin sulfate degradation	0	11	0.157046
Di-unsaturated fatty acid beta-oxidation	0	7	0.157046
Linoleate metabolism	0	48	0.157046
Hexose phosphorylation	0	14	0.157046
Vitamin B2 (riboflavin) metabolism	0	4	0.157046
Squalene and cholesterol biosynthesis	0	15	0.157046
Galactose metabolism	0	24	0.157046
Keratan sulfate degradation	0	13	0.157046
Glycerolipid metabolism	0	0	0.157046
Carnitine shuttle	0	12	0.157046
3-oxo-10R-octadecatrienoate beta-oxidation	0	13	0.157046
Alkaloid biosynthesis II	0	7	0.157046
Vitamin B1 (thiamin) metabolism	0	10	0.157046
Glycosphingolipid biosynthesis - globoseries	0	7	0.157046
Vitamin B5 - CoA biosynthesis from pantothenate	0	9	0.157046
Glycosylphosphatidylinositol(GPI)-anchor biosynthesis	0	2	0.157046
Glycosphingolipid biosynthesis - lactoseries	0	1	0.157046
Bile acid biosynthesis	0	12	0.157046
Parathio degradation	0	4	0.157046
Propanoate metabolism	0	8	0.157046
Blood Group Biosynthesis	0	1	0.157046
Electron transport chain	0	0	0.157046
Vitamin H (biotin) metabolism	0	2	0.157046
Biopterin metabolism	0	13	0.157046
Vitamin E metabolism	0	14	0.157046
Androgen and estrogen biosynthesis and metabolism	0	36	0.157046
Caffeine metabolism	0	16	0.157046
Lipoate metabolism	0	2	0.157046
Heparan sulfate biosynthesis	0	0	0.157046
Glyoxylate and Dicarboxylate Metabolism	0	9	0.157046
De novo fatty acid biosynthesis	0	23	0.157046
Vitamin A (retinol) metabolism	0	16	0.157046
Fatty Acid Metabolism	0	22	0.157046
Glycosaminoglycan degradation	0	0	0.157046
Fatty acid oxidation	0	1	0.157046
Fructose and mannose metabolism	0	17	0.157046
ROS Detoxification	0	0	0.157046
Xenobiotics metabolism	0	59	0.157046
Saturated fatty acids beta-oxidation	0	5	0.157046
CoA Catabolism	0	5	0.157046
Omega-3 fatty acid metabolism	0	13	0.157046
Mono-unsaturated fatty acid beta-oxidation	0	3	0.157046
Glycosphingolipid biosynthesis - neolactoseries	0	1	0.157046
Geraniol degradation	0	0	0.157046
D4&E4-neuroprostanes formation	0	6	0.157046
Vitamin D	0	2	0.157046
Dynorphin metabolism	0	0	0.157046
Heparan sulfate degradation	0	11	0.157046
Fatty acid oxidation, peroxisome	0	1	0.157046
Polyunsaturated fatty acid biosynthesis	0	1	0.157046
Keratan sulfate biosynthesis	0	3	0.157046
TCA cycle	0	17	0.157046
3-Chloroacrylic acid degradation	0	4	0.157046
Sphingolipid metabolism	0	2	0.157046
O-Glycan biosynthesis	0	1	0.157046
Glycosphingolipid metabolism	0	29	0.157046
Proteoglycan biosynthesis	0	2	0.157046
Vitamin K metabolism	0	0	0.157046
Glycerophospholipid metabolism	0	51	0.157046
Porphyrin metabolism	0	11	0.157046
Phosphatidylinositol phosphate metabolism	0	19	0.157046
Benzoate degradation via CoA ligation	0	1	0.157046
Prostaglandin formation from arachidonate	0	25	0.157046
Dimethyl-branched-chain fatty acid mitochondrial beta-oxidation	0	0	0.157046
Vitamin B6 (pyridoxine) metabolism	0	8	0.157046
Pentose and Glucuronate Interconversions	0	8	0.157046
Atrazine degradation	0	0	0.157046
N-Glycan Degradation	0	13	0.157046
Vitamin B12 (cyanocobalamin) metabolism	0	2	0.157046
Fatty acid activation	0	34	0.157046
Carbon fixation	0	10	0.157046
Nucleotide Sugar Metabolism	0	2	0.157046
Ubiquinone Biosynthesis	0	7	0.157046
1- and 2-Methylnaphthalene degradation	0	5	0.157046
Drug metabolism - other enzymes	0	16	0.157046
Prostaglandin formation from dihomo gama-linoleic acid	0	2	0.157046
C21-steroid hormone biosynthesis and metabolism	0	42	0.157046
Starch and Sucrose Metabolism	0	9	0.157046
Trihydroxycoprostanoyl-CoA beta-oxidation	0	0	0.157046
Omega-6 fatty acid metabolism	0	3	0.157046
Phytanic acid peroxisomal oxidation	0	5	0.157046
Pentose phosphate pathway	0	25	0.157046

## Sheet: Thalamus
Supplemental Table 8. Metabolic pathways associated with the thalamus
Metabolic Pathway	Metabolite hits	Metabolite pathway size	P-value
Urea cycle/amino group metabolism	3	71	0.0224351
Arginine and Proline Metabolism	2	40	0.0352071
Tryptophan metabolism	3	89	0.041089
Limonene and pinene degradation	1	10	0.0436938
Hexose phosphorylation	1	14	0.0540291
Pentose phosphate pathway	1	25	0.0730191
Aminosugars metabolism	1	28	0.0762961
Drug metabolism - cytochrome P450	1	30	0.0778926
Lysine metabolism	1	30	0.0778926
Histidine metabolism	1	35	0.0814217
Pyrimidine metabolism	1	51	0.0889841
Methionine and cysteine metabolism	1	62	0.0911688
Aspartate and asparagine metabolism	1	78	0.091925
Vitamin D3 (cholecalciferol) metabolism	0	10	0.0924292
Hyaluronan Metabolism	0	4	0.0924292
N-Glycan biosynthesis	0	8	0.0924292
Glycolysis and Gluconeogenesis	0	29	0.0924292
Glycosphingolipid biosynthesis - ganglioseries	0	12	0.0924292
R Group Synthesis	0	0	0.0924292
C5-Branched dibasic acid metabolism	0	2	0.0924292
Pyruvate Metabolism	0	8	0.0924292
Sialic acid metabolism	0	23	0.0924292
Chondroitin sulfate degradation	0	11	0.0924292
Di-unsaturated fatty acid beta-oxidation	0	7	0.0924292
Putative anti-Inflammatory metabolites formation from EPA	0	14	0.0924292
Linoleate metabolism	0	48	0.0924292
Vitamin B2 (riboflavin) metabolism	0	4	0.0924292
Squalene and cholesterol biosynthesis	0	15	0.0924292
Galactose metabolism	0	24	0.0924292
Keratan sulfate degradation	0	13	0.0924292
Glycerolipid metabolism	0	0	0.0924292
Carnitine shuttle	0	12	0.0924292
3-oxo-10R-octadecatrienoate beta-oxidation	0	13	0.0924292
Alkaloid biosynthesis II	0	7	0.0924292
Vitamin B1 (thiamin) metabolism	0	10	0.0924292
Glycosphingolipid biosynthesis - globoseries	0	7	0.0924292
Vitamin B5 - CoA biosynthesis from pantothenate	0	9	0.0924292
Glycosylphosphatidylinositol(GPI)-anchor biosynthesis	0	2	0.0924292
Glycosphingolipid biosynthesis - lactoseries	0	1	0.0924292
Bile acid biosynthesis	0	12	0.0924292
Parathio degradation	0	4	0.0924292
Propanoate metabolism	0	8	0.0924292
Blood Group Biosynthesis	0	1	0.0924292
Electron transport chain	0	0	0.0924292
Vitamin H (biotin) metabolism	0	2	0.0924292
Biopterin metabolism	0	13	0.0924292
Vitamin E metabolism	0	14	0.0924292
Androgen and estrogen biosynthesis and metabolism	0	36	0.0924292
Glycine, serine, alanine and threonine metabolism	0	61	0.0924292
Caffeine metabolism	0	16	0.0924292
Lipoate metabolism	0	2	0.0924292
Heparan sulfate biosynthesis	0	0	0.0924292
Vitamin B9 (folate) metabolism	0	10	0.0924292
Glyoxylate and Dicarboxylate Metabolism	0	9	0.0924292
De novo fatty acid biosynthesis	0	23	0.0924292
Vitamin A (retinol) metabolism	0	16	0.0924292
Valine, leucine and isoleucine degradation	0	20	0.0924292
Fatty Acid Metabolism	0	22	0.0924292
Glycosaminoglycan degradation	0	0	0.0924292
Fatty acid oxidation	0	1	0.0924292
Fructose and mannose metabolism	0	17	0.0924292
ROS Detoxification	0	0	0.0924292
Xenobiotics metabolism	0	59	0.0924292
Saturated fatty acids beta-oxidation	0	5	0.0924292
CoA Catabolism	0	5	0.0924292
Omega-3 fatty acid metabolism	0	13	0.0924292
Butanoate metabolism	0	24	0.0924292
Mono-unsaturated fatty acid beta-oxidation	0	3	0.0924292
Glycosphingolipid biosynthesis - neolactoseries	0	1	0.0924292
Vitamin B3 (nicotinate and nicotinamide) metabolism	0	23	0.0924292
Ascorbate (Vitamin C) and Aldarate Metabolism	0	18	0.0924292
Geraniol degradation	0	0	0.0924292
D4&E4-neuroprostanes formation	0	6	0.0924292
Vitamin D	0	2	0.0924292
Dynorphin metabolism	0	0	0.0924292
Heparan sulfate degradation	0	11	0.0924292
Fatty acid oxidation, peroxisome	0	1	0.0924292
Polyunsaturated fatty acid biosynthesis	0	1	0.0924292
Purine metabolism	0	56	0.0924292
Alanine and Aspartate Metabolism	0	23	0.0924292
Glutathione Metabolism	0	17	0.0924292
Keratan sulfate biosynthesis	0	3	0.0924292
TCA cycle	0	17	0.0924292
3-Chloroacrylic acid degradation	0	4	0.0924292
Arachidonic acid metabolism	0	23	0.0924292
Sphingolipid metabolism	0	2	0.0924292
O-Glycan biosynthesis	0	1	0.0924292
Glycosphingolipid metabolism	0	29	0.0924292
Proteoglycan biosynthesis	0	2	0.0924292
Vitamin K metabolism	0	0	0.0924292
Glycerophospholipid metabolism	0	51	0.0924292
Glutamate metabolism	0	16	0.0924292
Porphyrin metabolism	0	11	0.0924292
Phosphatidylinositol phosphate metabolism	0	19	0.0924292
Benzoate degradation via CoA ligation	0	1	0.0924292
Prostaglandin formation from arachidonate	0	25	0.0924292
Dimethyl-branched-chain fatty acid mitochondrial beta-oxidation	0	0	0.0924292
Vitamin B6 (pyridoxine) metabolism	0	8	0.0924292
Pentose and Glucuronate Interconversions	0	8	0.0924292
Atrazine degradation	0	0	0.0924292
N-Glycan Degradation	0	13	0.0924292
Leukotriene metabolism	0	24	0.0924292
Vitamin B12 (cyanocobalamin) metabolism	0	2	0.0924292
Fatty acid activation	0	34	0.0924292
Carbon fixation	0	10	0.0924292
Nucleotide Sugar Metabolism	0	2	0.0924292
Ubiquinone Biosynthesis	0	7	0.0924292
1- and 2-Methylnaphthalene degradation	0	5	0.0924292
Nitrogen metabolism	0	6	0.0924292
Drug metabolism - other enzymes	0	16	0.0924292
Tyrosine metabolism	1	114	0.0924292
Beta-Alanine metabolism	0	17	0.0924292
Prostaglandin formation from dihomo gama-linoleic acid	0	2	0.0924292
C21-steroid hormone biosynthesis and metabolism	0	42	0.0924292
Starch and Sucrose Metabolism	0	9	0.0924292
Trihydroxycoprostanoyl-CoA beta-oxidation	0	0	0.0924292
Omega-6 fatty acid metabolism	0	3	0.0924292
Phytanic acid peroxisomal oxidation	0	5	0.0924292
Selenoamino acid metabolism	0	17	0.0924292

## Sheet: Hippocampus (left, cluster B)
Supplemental Table 9. Metabolic pathways associated with the left hemisphere of the hippocampus (cluster B)
Metabolic Pathway	Metabolite hits	Metabolite pathway size	P-value
Urea cycle/amino group metabolism	4	71	0.0164692
Tryptophan metabolism	4	89	0.0310058
Lysine metabolism	2	30	0.0426015
Histidine metabolism	2	35	0.0565499
Arginine and Proline Metabolism	2	40	0.0711705
Vitamin B1 (thiamin) metabolism	1	10	0.0724309
Limonene and pinene degradation	1	10	0.0724309
Hexose phosphorylation	1	14	0.0951181
Ascorbate (Vitamin C) and Aldarate Metabolism	1	18	0.109655
Glycine, serine, alanine and threonine metabolism	2	61	0.115452
Pentose phosphate pathway	1	25	0.128225
Aminosugars metabolism	1	28	0.134947
Drug metabolism - cytochrome P450	1	30	0.13856
Purine metabolism	1	56	0.161331
Methionine and cysteine metabolism	1	62	0.163768
Aspartate and asparagine metabolism	1	78	0.166205
Vitamin D3 (cholecalciferol) metabolism	0	10	0.168389
Hyaluronan Metabolism	0	4	0.168389
N-Glycan biosynthesis	0	8	0.168389
Glycolysis and Gluconeogenesis	0	29	0.168389
Glycosphingolipid biosynthesis - ganglioseries	0	12	0.168389
R Group Synthesis	0	0	0.168389
C5-Branched dibasic acid metabolism	0	2	0.168389
Pyruvate Metabolism	0	8	0.168389
Sialic acid metabolism	0	23	0.168389
Chondroitin sulfate degradation	0	11	0.168389
Di-unsaturated fatty acid beta-oxidation	0	7	0.168389
Putative anti-Inflammatory metabolites formation from EPA	0	14	0.168389
Linoleate metabolism	0	48	0.168389
Vitamin B2 (riboflavin) metabolism	0	4	0.168389
Squalene and cholesterol biosynthesis	0	15	0.168389
Galactose metabolism	0	24	0.168389
Keratan sulfate degradation	0	13	0.168389
Glycerolipid metabolism	0	0	0.168389
Carnitine shuttle	0	12	0.168389
3-oxo-10R-octadecatrienoate beta-oxidation	0	13	0.168389
Alkaloid biosynthesis II	0	7	0.168389
Glycosphingolipid biosynthesis - globoseries	0	7	0.168389
Vitamin B5 - CoA biosynthesis from pantothenate	0	9	0.168389
Glycosylphosphatidylinositol(GPI)-anchor biosynthesis	0	2	0.168389
Glycosphingolipid biosynthesis - lactoseries	0	1	0.168389
Bile acid biosynthesis	0	12	0.168389
Parathio degradation	0	4	0.168389
Propanoate metabolism	0	8	0.168389
Blood Group Biosynthesis	0	1	0.168389
Electron transport chain	0	0	0.168389
Vitamin H (biotin) metabolism	0	2	0.168389
Biopterin metabolism	0	13	0.168389
Vitamin E metabolism	0	14	0.168389
Androgen and estrogen biosynthesis and metabolism	0	36	0.168389
Caffeine metabolism	0	16	0.168389
Lipoate metabolism	0	2	0.168389
Heparan sulfate biosynthesis	0	0	0.168389
Vitamin B9 (folate) metabolism	0	10	0.168389
Glyoxylate and Dicarboxylate Metabolism	0	9	0.168389
De novo fatty acid biosynthesis	0	23	0.168389
Vitamin A (retinol) metabolism	0	16	0.168389
Valine, leucine and isoleucine degradation	0	20	0.168389
Fatty Acid Metabolism	0	22	0.168389
Glycosaminoglycan degradation	0	0	0.168389
Fatty acid oxidation	0	1	0.168389
Fructose and mannose metabolism	0	17	0.168389
ROS Detoxification	0	0	0.168389
Xenobiotics metabolism	0	59	0.168389
Saturated fatty acids beta-oxidation	0	5	0.168389
CoA Catabolism	0	5	0.168389
Omega-3 fatty acid metabolism	0	13	0.168389
Butanoate metabolism	0	24	0.168389
Mono-unsaturated fatty acid beta-oxidation	0	3	0.168389
Glycosphingolipid biosynthesis - neolactoseries	0	1	0.168389
Vitamin B3 (nicotinate and nicotinamide) metabolism	0	23	0.168389
Geraniol degradation	0	0	0.168389
D4&E4-neuroprostanes formation	0	6	0.168389
Vitamin D	0	2	0.168389
Dynorphin metabolism	0	0	0.168389
Heparan sulfate degradation	0	11	0.168389
Fatty acid oxidation, peroxisome	0	1	0.168389
Polyunsaturated fatty acid biosynthesis	0	1	0.168389
Alanine and Aspartate Metabolism	0	23	0.168389
Glutathione Metabolism	0	17	0.168389
Keratan sulfate biosynthesis	0	3	0.168389
TCA cycle	0	17	0.168389
3-Chloroacrylic acid degradation	0	4	0.168389
Arachidonic acid metabolism	0	23	0.168389
Sphingolipid metabolism	0	2	0.168389
O-Glycan biosynthesis	0	1	0.168389
Glycosphingolipid metabolism	0	29	0.168389
Proteoglycan biosynthesis	0	2	0.168389
Vitamin K metabolism	0	0	0.168389
Glycerophospholipid metabolism	0	51	0.168389
Glutamate metabolism	0	16	0.168389
Porphyrin metabolism	0	11	0.168389
Phosphatidylinositol phosphate metabolism	0	19	0.168389
Benzoate degradation via CoA ligation	0	1	0.168389
Prostaglandin formation from arachidonate	0	25	0.168389
Dimethyl-branched-chain fatty acid mitochondrial beta-oxidation	0	0	0.168389
Vitamin B6 (pyridoxine) metabolism	0	8	0.168389
Pentose and Glucuronate Interconversions	0	8	0.168389
Atrazine degradation	0	0	0.168389
N-Glycan Degradation	0	13	0.168389
Leukotriene metabolism	0	24	0.168389
Vitamin B12 (cyanocobalamin) metabolism	0	2	0.168389
Fatty acid activation	0	34	0.168389
Carbon fixation	0	10	0.168389
Nucleotide Sugar Metabolism	0	2	0.168389
Ubiquinone Biosynthesis	0	7	0.168389
1- and 2-Methylnaphthalene degradation	0	5	0.168389
Pyrimidine metabolism	0	51	0.168389
Nitrogen metabolism	0	6	0.168389
Drug metabolism - other enzymes	0	16	0.168389
Tyrosine metabolism	0	114	0.168389
Beta-Alanine metabolism	0	17	0.168389
Prostaglandin formation from dihomo gama-linoleic acid	0	2	0.168389
C21-steroid hormone biosynthesis and metabolism	0	42	0.168389
Starch and Sucrose Metabolism	0	9	0.168389
Trihydroxycoprostanoyl-CoA beta-oxidation	0	0	0.168389
Omega-6 fatty acid metabolism	0	3	0.168389
Phytanic acid peroxisomal oxidation	0	5	0.168389
Selenoamino acid metabolism	0	17	0.168389

## Sheet: Occipital lobe
Supplemental Table 10. Metabolic pathways associated with the occipital lobe
Metabolic Pathway	Metabolite hits	Metabolite pathway size	P-value
Vitamin D	1	2	0.0243677
Mono-unsaturated fatty acid beta-oxidation	1	3	0.0353752
Saturated fatty acids beta-oxidation	1	5	0.0580623
Fatty Acid Metabolism	2	22	0.0588186
Urea cycle/amino group metabolism	4	71	0.0699941
Di-unsaturated fatty acid beta-oxidation	1	7	0.0818419
Ubiquinone Biosynthesis	1	7	0.0818419
Lysine metabolism	2	30	0.0994874
Vitamin D3 (cholecalciferol) metabolism	1	10	0.113688
Vitamin B1 (thiamin) metabolism	1	10	0.113688
Histidine metabolism	2	35	0.125116
Tryptophan metabolism	4	89	0.125116
3-oxo-10R-octadecatrienoate beta-oxidation	1	13	0.14024
Omega-3 fatty acid metabolism	1	13	0.14024
Arginine and Proline Metabolism	2	40	0.146962
Hexose phosphorylation	1	14	0.147971
Squalene and cholesterol biosynthesis	1	15	0.155617
Caffeine metabolism	1	16	0.161079
Selenoamino acid metabolism	1	17	0.166541
Ascorbate (Vitamin C) and Aldarate Metabolism	1	18	0.174607
Pyrimidine metabolism	2	51	0.185447
Tyrosine metabolism	4	114	0.185615
De novo fatty acid biosynthesis	1	23	0.194017
Vitamin B3 (nicotinate and nicotinamide) metabolism	1	23	0.194017
Purine metabolism	2	56	0.194858
Pentose phosphate pathway	1	25	0.199311
Xenobiotics metabolism	2	59	0.200403
Glycine, serine, alanine and threonine metabolism	2	61	0.203092
Methionine and cysteine metabolism	2	62	0.205361
Aminosugars metabolism	1	28	0.206369
Drug metabolism - cytochrome P450	1	30	0.210318
Fatty acid activation	1	34	0.217377
Linoleate metabolism	1	48	0.232165
Glycerophospholipid metabolism	1	51	0.233594
Aspartate and asparagine metabolism	1	78	0.238887
Hyaluronan Metabolism	0	4	0.23956
N-Glycan biosynthesis	0	8	0.23956
Glycolysis and Gluconeogenesis	0	29	0.23956
Glycosphingolipid biosynthesis - ganglioseries	0	12	0.23956
R Group Synthesis	0	0	0.23956
C5-Branched dibasic acid metabolism	0	2	0.23956
Pyruvate Metabolism	0	8	0.23956
Sialic acid metabolism	0	23	0.23956
Chondroitin sulfate degradation	0	11	0.23956
Putative anti-Inflammatory metabolites formation from EPA	0	14	0.23956
Vitamin B2 (riboflavin) metabolism	0	4	0.23956
Galactose metabolism	0	24	0.23956
Keratan sulfate degradation	0	13	0.23956
Glycerolipid metabolism	0	0	0.23956
Carnitine shuttle	0	12	0.23956
Alkaloid biosynthesis II	0	7	0.23956
Glycosphingolipid biosynthesis - globoseries	0	7	0.23956
Vitamin B5 - CoA biosynthesis from pantothenate	0	9	0.23956
Glycosylphosphatidylinositol(GPI)-anchor biosynthesis	0	2	0.23956
Glycosphingolipid biosynthesis - lactoseries	0	1	0.23956
Bile acid biosynthesis	0	12	0.23956
Parathio degradation	0	4	0.23956
Propanoate metabolism	0	8	0.23956
Blood Group Biosynthesis	0	1	0.23956
Electron transport chain	0	0	0.23956
Vitamin H (biotin) metabolism	0	2	0.23956
Biopterin metabolism	0	13	0.23956
Vitamin E metabolism	0	14	0.23956
Androgen and estrogen biosynthesis and metabolism	0	36	0.23956
Lipoate metabolism	0	2	0.23956
Heparan sulfate biosynthesis	0	0	0.23956
Vitamin B9 (folate) metabolism	0	10	0.23956
Glyoxylate and Dicarboxylate Metabolism	0	9	0.23956
Vitamin A (retinol) metabolism	0	16	0.23956
Valine, leucine and isoleucine degradation	0	20	0.23956
Glycosaminoglycan degradation	0	0	0.23956
Fatty acid oxidation	0	1	0.23956
Fructose and mannose metabolism	0	17	0.23956
ROS Detoxification	0	0	0.23956
CoA Catabolism	0	5	0.23956
Butanoate metabolism	0	24	0.23956
Glycosphingolipid biosynthesis - neolactoseries	0	1	0.23956
Geraniol degradation	0	0	0.23956
D4&E4-neuroprostanes formation	0	6	0.23956
Dynorphin metabolism	0	0	0.23956
Heparan sulfate degradation	0	11	0.23956
Fatty acid oxidation, peroxisome	0	1	0.23956
Polyunsaturated fatty acid biosynthesis	0	1	0.23956
Alanine and Aspartate Metabolism	0	23	0.23956
Glutathione Metabolism	0	17	0.23956
Keratan sulfate biosynthesis	0	3	0.23956
TCA cycle	0	17	0.23956
3-Chloroacrylic acid degradation	0	4	0.23956
Arachidonic acid metabolism	0	23	0.23956
Sphingolipid metabolism	0	2	0.23956
O-Glycan biosynthesis	0	1	0.23956
Glycosphingolipid metabolism	0	29	0.23956
Limonene and pinene degradation	0	10	0.23956
Proteoglycan biosynthesis	0	2	0.23956
Vitamin K metabolism	0	0	0.23956
Glutamate metabolism	0	16	0.23956
Porphyrin metabolism	0	11	0.23956
Phosphatidylinositol phosphate metabolism	0	19	0.23956
Benzoate degradation via CoA ligation	0	1	0.23956
Prostaglandin formation from arachidonate	0	25	0.23956
Dimethyl-branched-chain fatty acid mitochondrial beta-oxidation	0	0	0.23956
Vitamin B6 (pyridoxine) metabolism	0	8	0.23956
Pentose and Glucuronate Interconversions	0	8	0.23956
Atrazine degradation	0	0	0.23956
N-Glycan Degradation	0	13	0.23956
Leukotriene metabolism	0	24	0.23956
Vitamin B12 (cyanocobalamin) metabolism	0	2	0.23956
Carbon fixation	0	10	0.23956
Nucleotide Sugar Metabolism	0	2	0.23956
1- and 2-Methylnaphthalene degradation	0	5	0.23956
Nitrogen metabolism	0	6	0.23956
Drug metabolism - other enzymes	0	16	0.23956
Beta-Alanine metabolism	0	17	0.23956
Prostaglandin formation from dihomo gama-linoleic acid	0	2	0.23956
C21-steroid hormone biosynthesis and metabolism	0	42	0.23956
Starch and Sucrose Metabolism	0	9	0.23956
Trihydroxycoprostanoyl-CoA beta-oxidation	0	0	0.23956
Omega-6 fatty acid metabolism	0	3	0.23956
Phytanic acid peroxisomal oxidation	0	5	0.23956
